# Supplementary material
Source: PubMed Central journal article supplement (PMC4717520)
Supplement: NIHMS60476-supplement-1.pdf [file NIHMS60476-supplement-1.pdf]

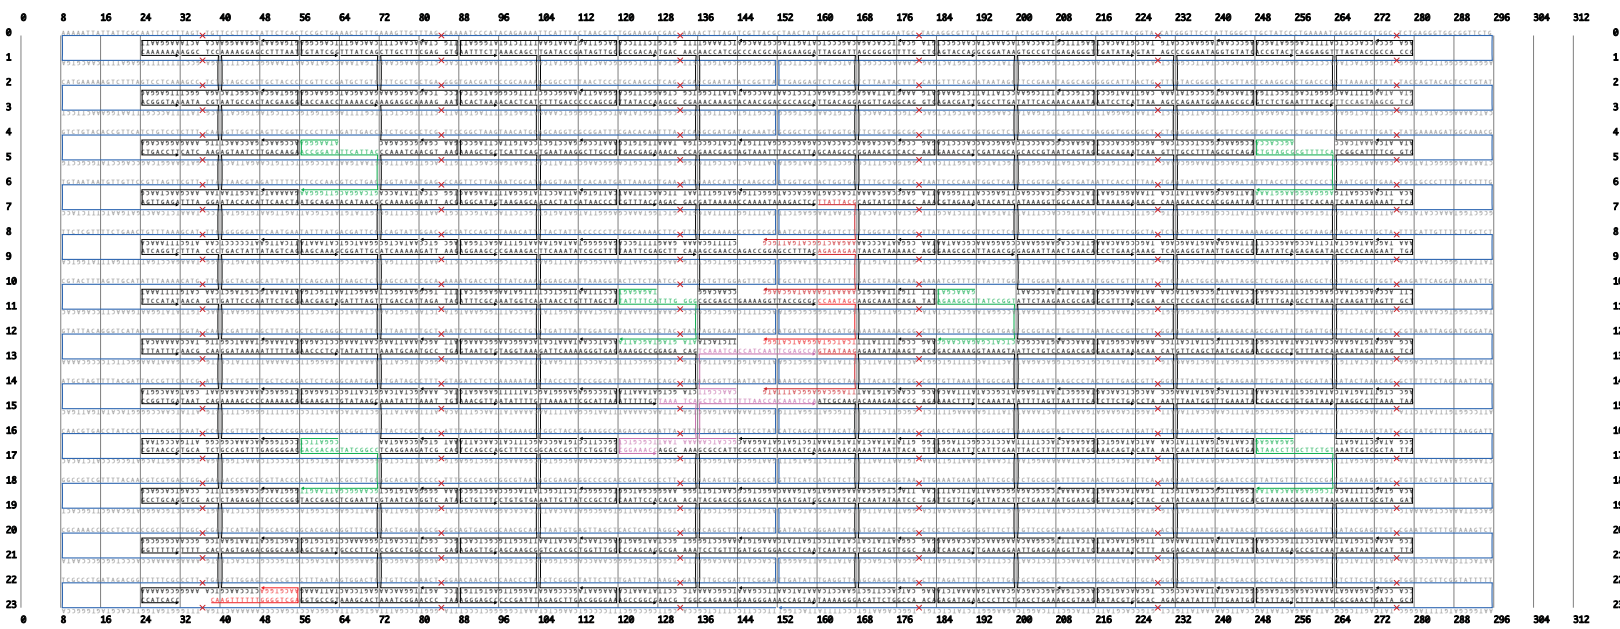

**Supplementary Figure 1 | Detailed design of the rectangular DNA origami.** The scaffold (blue) is crosslinked into the desired shape by staple binding without modification (black) with biotin at the 5' end (green), with a 15A capturing sequence for the NP at the 5' end (magenta) and an ATTO647N dye on one of the red staples. The arrows of the individual staples indicate the 5'→3' direction

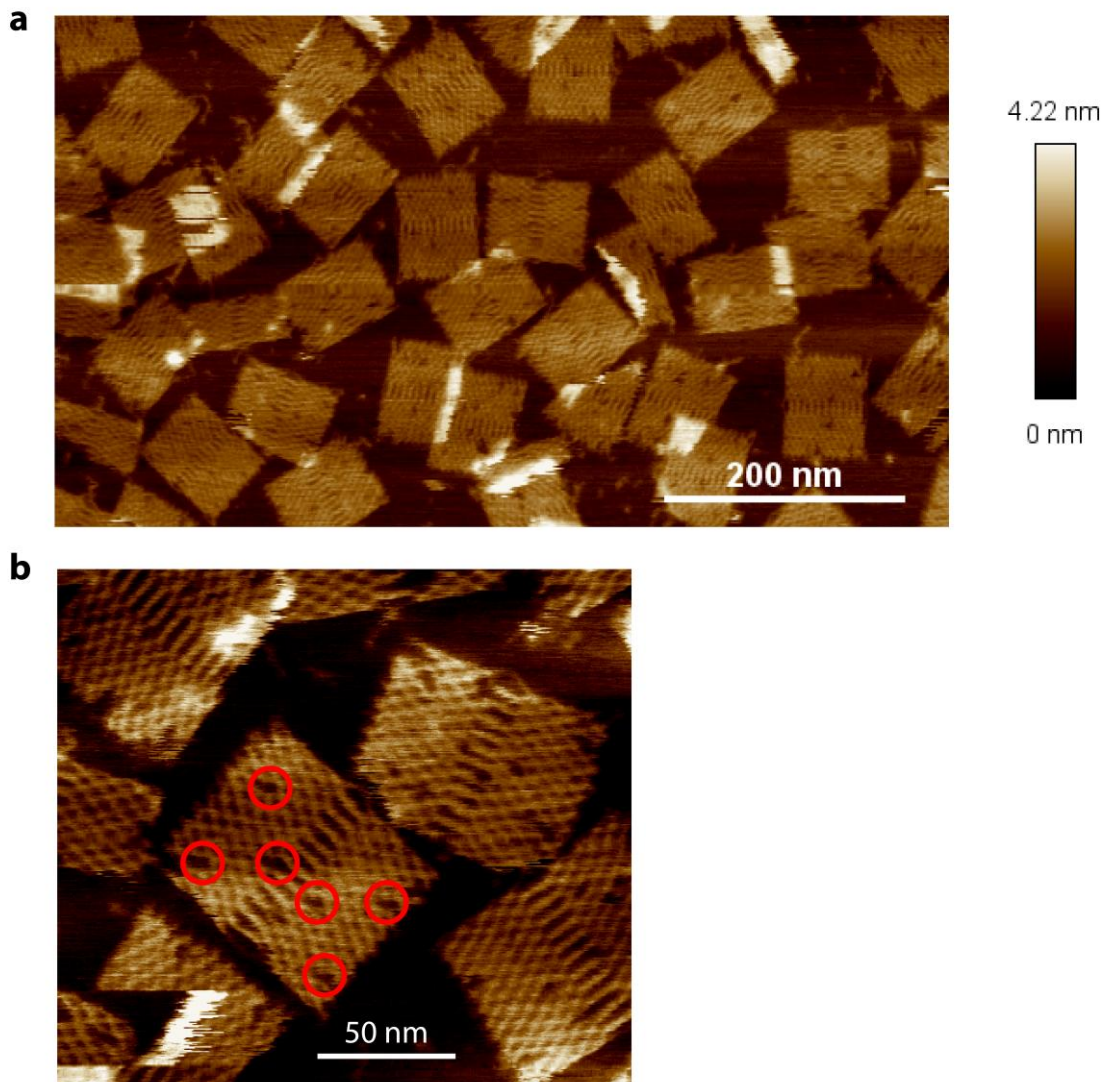

**Supplementary Figure 2 | AFM images of rectangular DNA origamis. (a)** Overview of area with a multitude of correctly formed rectangular DNA origamis. **(b)** High resolution AFM image of rectangular DNA origamis. The red circles indicate the positions of the six biotin modifications. Since the modified staples are shortened by 5 bases, the positions are visible as gaps in the DNA origami structure.

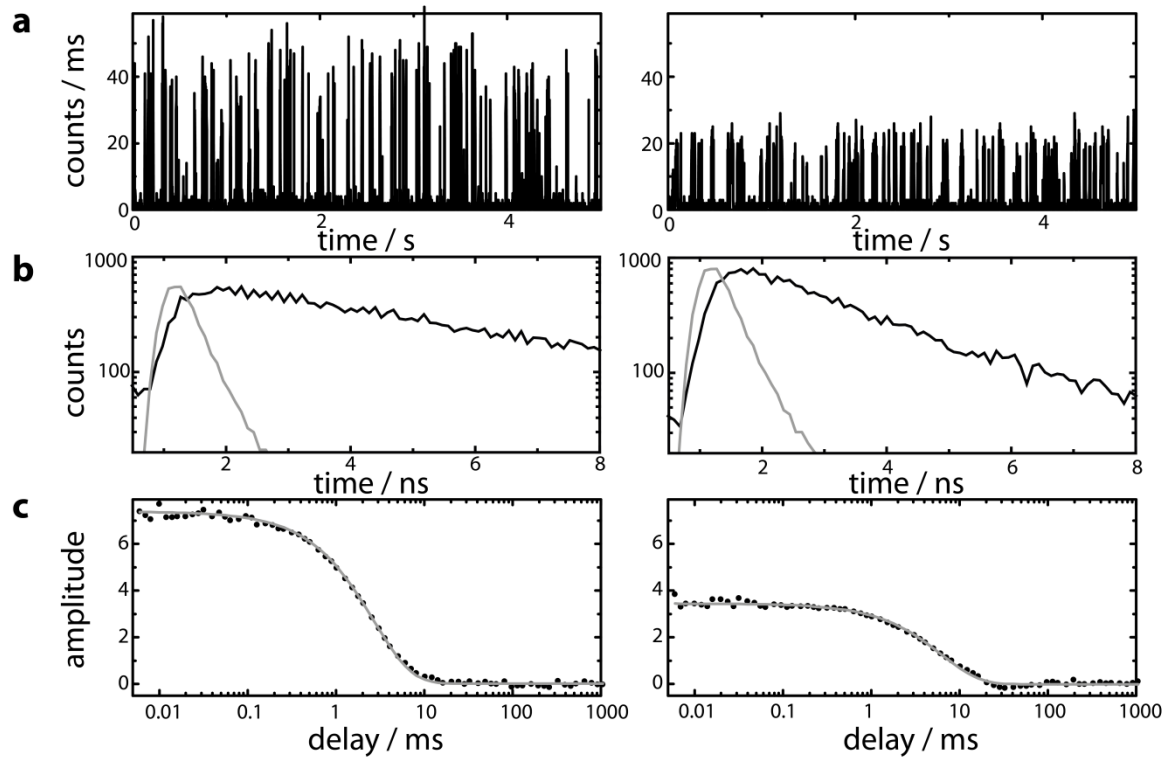

**Supplementary Figure 3 | Exemplary fluorescence transients (a) with corresponding fluorescence decays (b) and autocorrelation functions (c) for a dye without NP (left) and with a single 20 nm NP at a distance of 8.3 nm (right). This data is used to extract the parameters  $\tau$ ,  $t_{on}$  and  $t_{off}$ .**

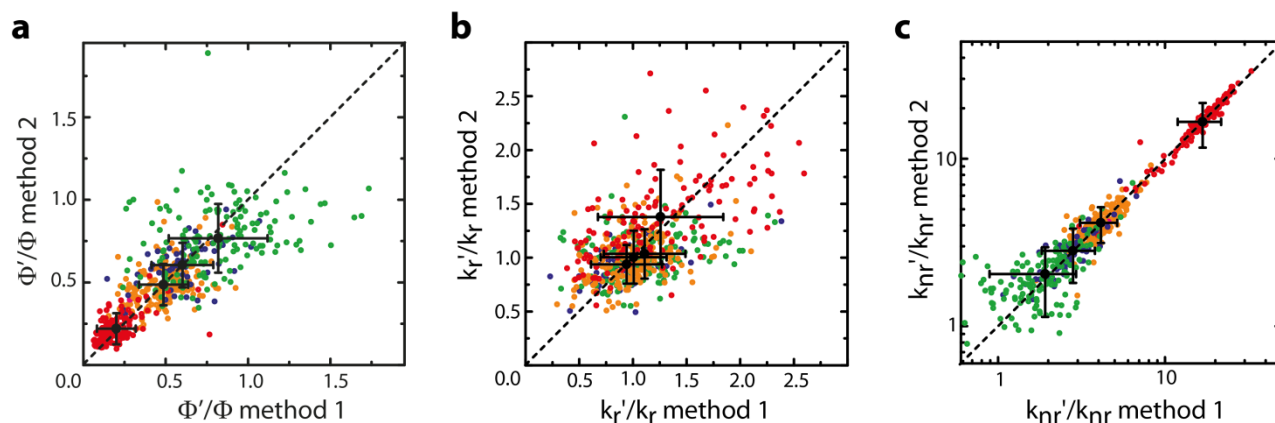

**Supplementary Figure 4 | Comparison between two methods to extract changes of photophysical**

**properties. (a)** Method 1 assumes constant excitation rate and calculates changes of the quantum yield from  $\Phi'/\Phi = I'_{on}/I_{on}$ , whereas method 2 uses equation (6) of the main text ( $\Phi'/\Phi = (N'_{on}\tau)/(N_{on}\tau)$ ). **(b)** The radiative rate change is calculated with method 1 as  $k'_r/k_r = (I'_{on}\tau)/(I_{on}\tau)$  or with method 2 and equation (5) of the main text  $k'_r/k_r = N'_{on}/N_{on}$ . **(c)** In both cases nonradiative rate changes are determined with  $k'_{nr}/k_{nr} = (\tau/\tau' - \Phi k'_r/k_r)/(1-\Phi)$  and the intrinsic quantum yield  $\Phi = 0.65$ . Data points represent fluorescent dyes at distances  $d_1 = 6.6$  nm (red,  $n=140$ ),  $d_2 = 8.3$  nm (orange,  $n=181$ ),  $d_3 = 11.2$  nm (blue,  $n=59$ ),  $d_4 = 15.0$  nm (green,  $n=147$ ) to the NP surface (20 nm diameter) and the respective mean values with standard deviation (black). Dashed lines indicate equivalent results for both methods.

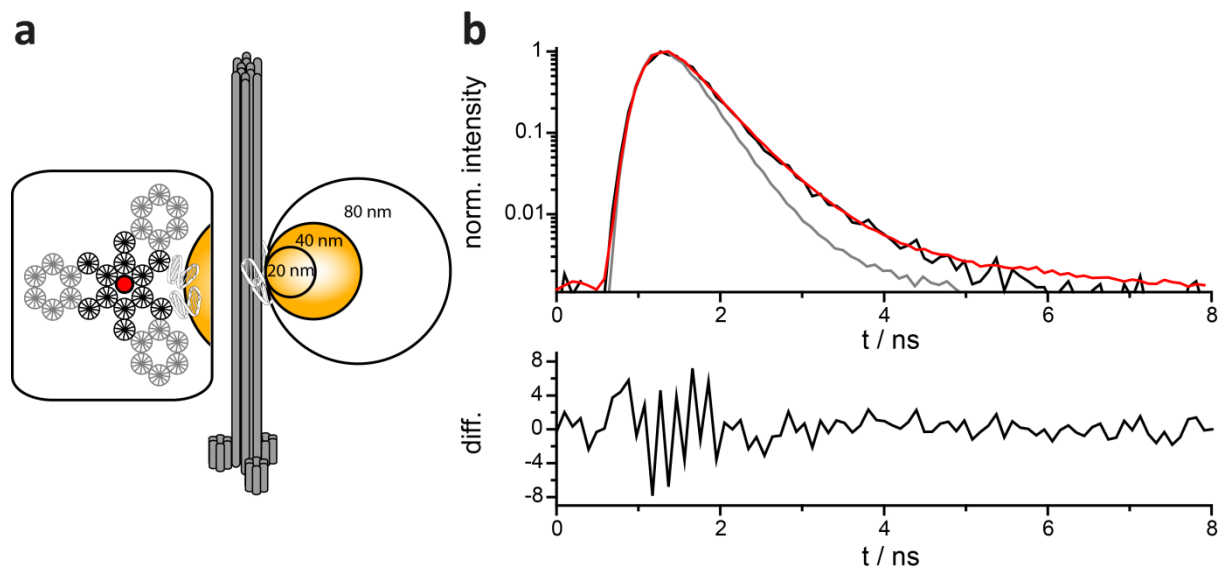

**Supplementary Figure 5 | DNA nanopillar sketch and exemplary fluorescence lifetime decay** **(a)** Sketch of the DNA nanopillar with the fluorescent dye Atto647N in the center of a 12-helix bundle (inset) and a gold NP of 20, 40 or 80 nm diameter attached to the side of the nanopillar. **(b)** Normalized fluorescence lifetime decay (black) with IRF (grey) and reconvoluted fit (red) for a dye close to an 80 nm Au NP with fluorescence lifetime of 0.46 ns. The lower panel shows the difference (not normalized) between the fit and the experimental decay. This decay is close to the lower bound of lifetimes that could be reasonably fitted.

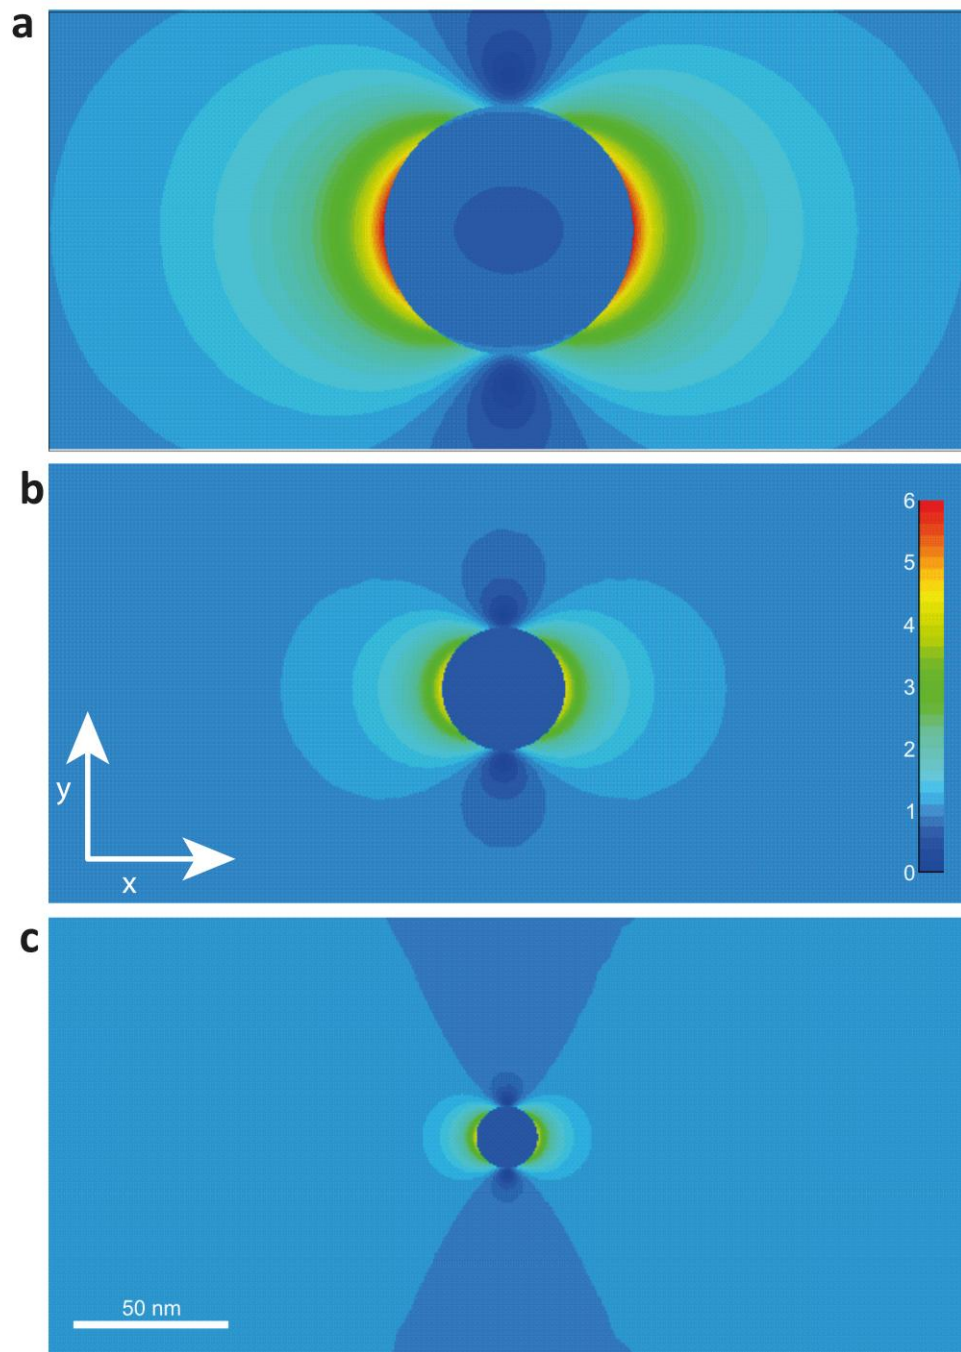

**Supplementary Figure 6 | Electric field distributions in the vicinity of gold NPs.** Electric field amplitude distribution normalized to the incident amplitude at the equatorial plane of gold NPs of different diameters: 80 nm (a), 40 nm (b) and 20 nm (c). The simulations were carried out with light of 640 nm wavelength polarized in x-direction and propagating in z-direction.

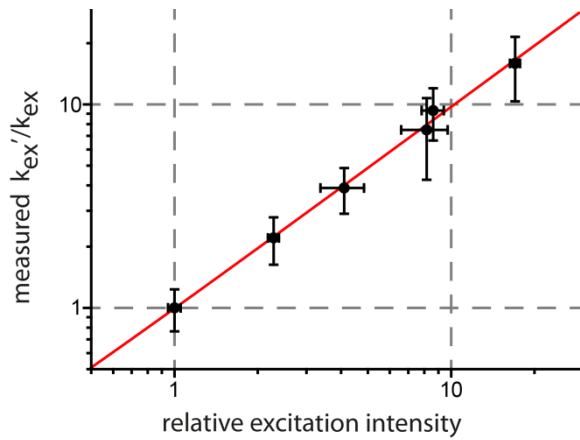

**Supplementary Figure 7 | Excitation rate changes can be quantified over at least one order of magnitude.** Data points represent the measured change of the excitation rate depending on the laser intensity used (0.29 - 4.89  $\mu\text{W}$ ,  $n=98, 100, 89, 77, 73, 57$  with increasing excitation intensity), normalized to the measurement at the lowest laser intensity. Error bars represent the standard deviation of the calculated rate changes and the laser intensity range measured before and after data collection, respectively. The red line is a linear fit to the data which yields an intercept of 0.024 and a slope of 0.970, which proves that the method can reliably detect changes of the excitation rate.

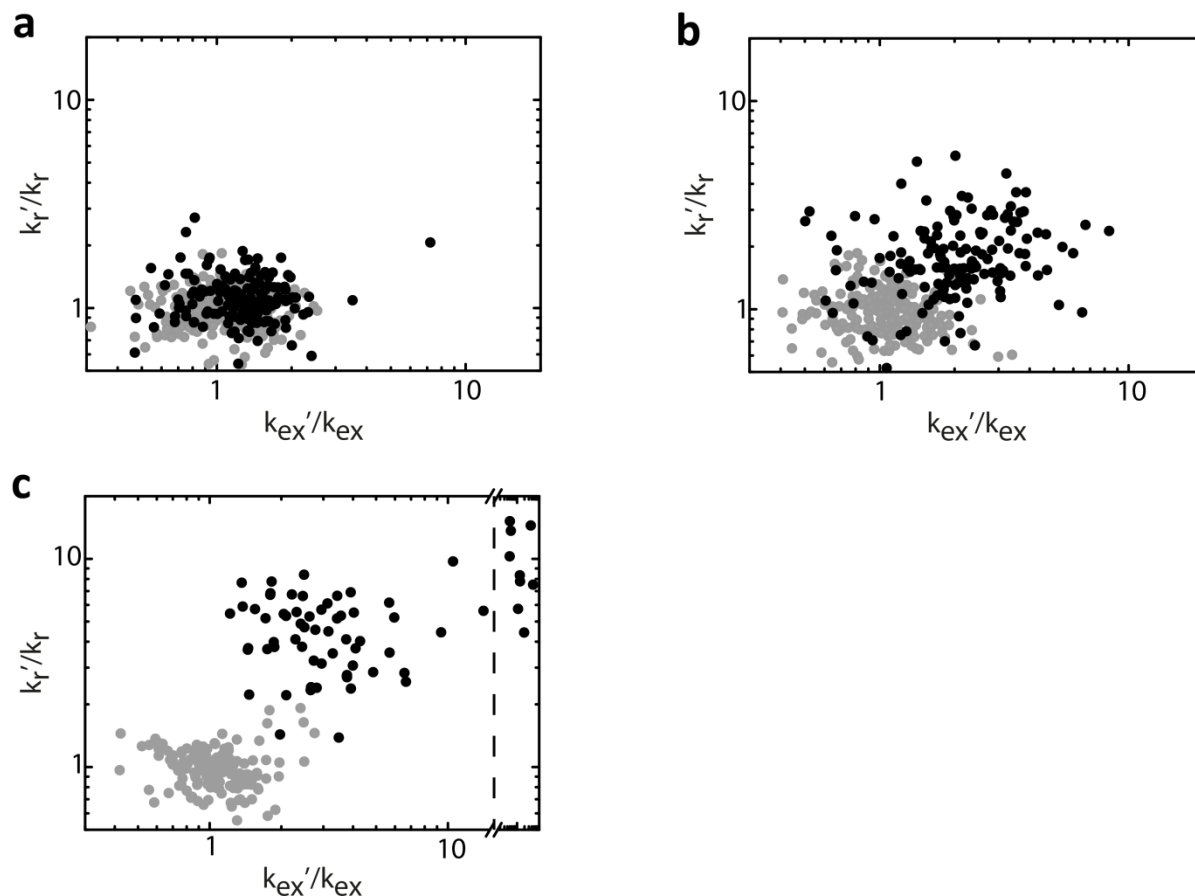

**Supplementary Figure 8 | Correlation of radiative and excitation rate with particle size. (a-c)** Radiative versus excitation rate constants of molecules with (black) and without NP (grey) normalized to the mean value of the molecules without NP for particles sizes of 20 (a), 40 (b) and 80 nm (c). The data points for one particle size do not exhibit a strong correlation between excitation and radiative rate constant. Data points beyond the break in (c) are not considered for the excitation rate because their fluorescence lifetime could not be determined accurately due to the temporal resolution of our experimental setup. According to the simulations in Figure 4 of the main text, the particle size (and also the distance) should affect both excitation and radiative rate in a similar fashion. Since we observe no strong correlation within the individual samples, we conclude that the size distribution of the gold NPs is not the major contribution for heterogeneous excitation rates. This finding is, however, in agreement with the orientational distribution of the DNA nanopillar as measured with superresolution microscopy<sup>1</sup>. Sample size: n=148, 142 and 69 for NPs of 20, 40 and 80 nm diameter; and n=214, 226 and 154 for the reference molecules without NP.



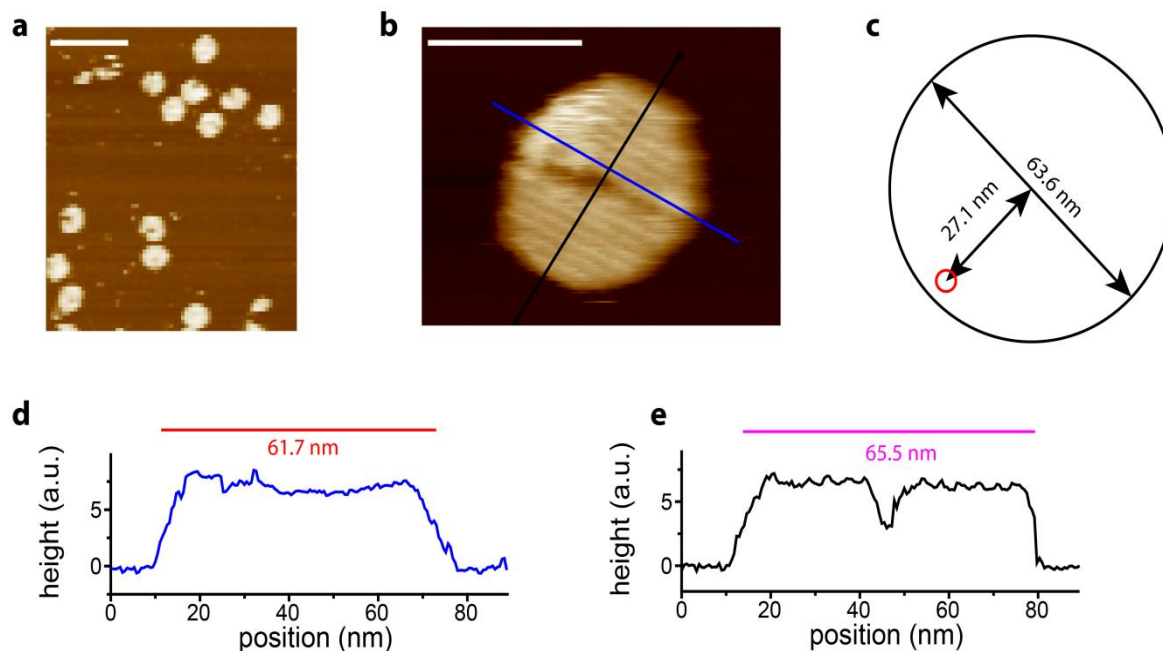

**Supplementary Figure 9 | AFM measurements of the DNA nanodisk. (a)** Low resolution AFM image of several self-assembled DNA nanostructures. Scale bar: 200 nm. **(b)** High resolution AFM image of a single DNA nanodisk. The blue and black lines indicate the cross sections presented in panel d and e. Scale bar: 50 nm. **(c)** Dimensions of the nanodisk used for simulation of the position distribution: the diameter of 63.6 nm is the average of the calculated length along the longest helices (61.7 nm, 0.34 nm/bp) and across the helices (65.5 nm, 2.7 nm helix-helix distance, honeycomb lattice). The distance of the dye to the center of the DNA structure is calculated as 27.1 nm. **(d)** Profile of the DNA nanodisk along one double helix together with red bar indicating the calculated length. **(e)** Profile of the DNA nanodisk perpendicular to the helices together with magenta bar indicating the calculated length.

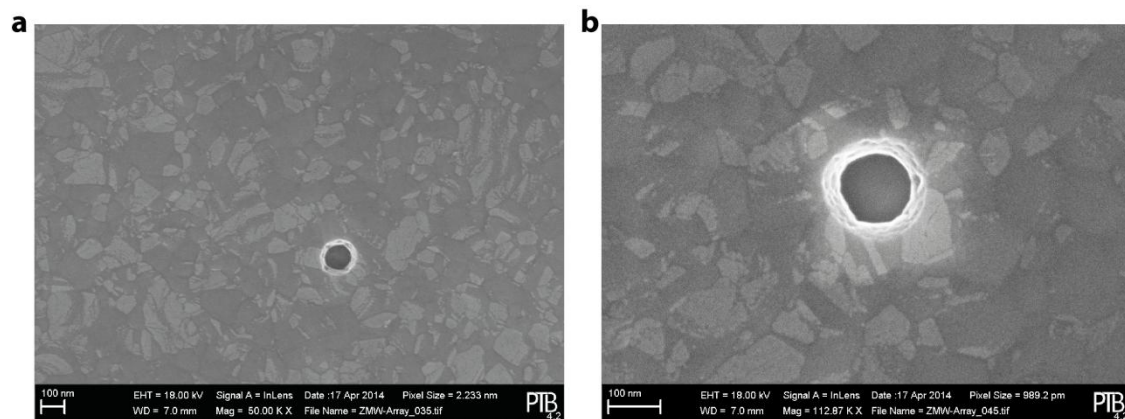

**Supplementary Figure 10 | Exemplary SEM images (a)** Image of 114 nm ZMW with measured width and height of 116.1 nm and 111.7 nm respectively. **(b)** Image of 136 nm sample with measured width and height of 133.5 nm and 135.5 nm respectively.

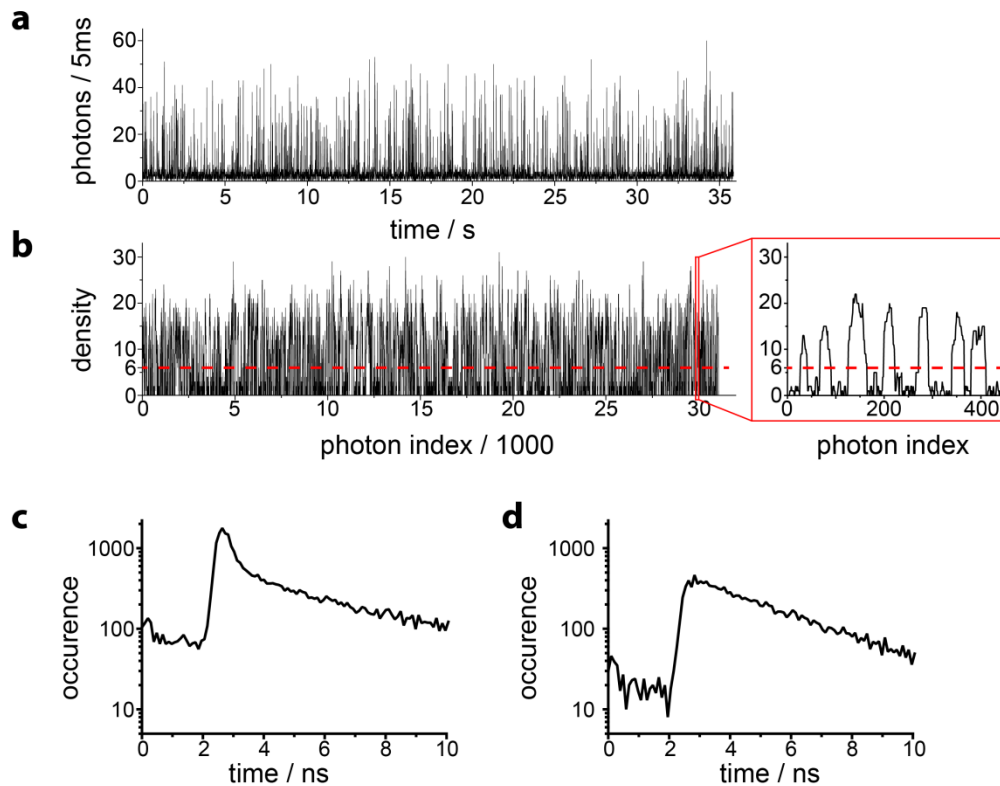

**Supplementary Figure 11 | Fluorescence lifetime analysis in presence of high scattering background.**

**(a)** Fluorescence transient of an Atto647N dye on a DNA nanodisk in a nanoaperture of 114 nm diameter. **(b)** In order to remove photons that are clearly associated with scattering, we determine the number of detected photons in a 2 ms window centered around each photon. This photon density can now be used as a threshold to separate on- and off-times. Unlike intensity thresholding, this approach is insensitive to temporal binning of the fluorescence transient. The right plot shows a magnified range of the photon density of the data in panel (a). The mostly used threshold value of 6 photons per 2 ms window is indicated as dashed red line, in some cases the threshold was adjusted as necessary. **(c)** Fluorescence lifetime decay without thresholding exhibits a large portion of scattering. **(d)** Fluorescence lifetime decay after thresholding as indicated in (b). While the majority of scattering is removed, there is still a scattering component present that needs to be considered for analysis. The fluorescence-to-scattering ratio is however clearly improved.

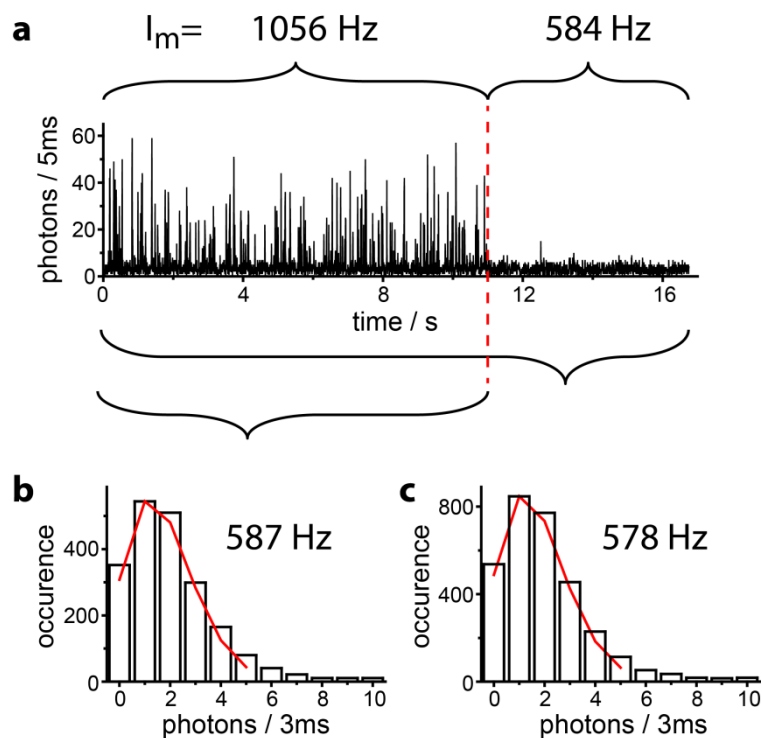

**Supplementary Figure 12 | Background determination with poissonian fitting.** **(a)** Fluorescence transient of an Atto647N dye on a DNA nanodisk in a nanoaperture of 200 nm diameter. The mean intensities  $I_m$  before (1056 Hz) and after bleaching (584 Hz) are indicated. **(b,c)** Intensity histograms of different ranges for 3 ms binning are fitted with a poissonian distribution (red line, numbers indicate mean value of the poissonian). For the fitting procedure both distributions were normalized to their maximum and result in values close to the background intensity after photobleaching. Depending on the background level and intensity of the molecule, the histogram binning and the number of fitted bins were adjusted (1-4 ms and 4-7 bins respectively). The background level for the ZMW measurements was determined by this procedure rather than by measuring the mean intensity after photobleaching, because the lifespan of the dyes in the nanoapertures often exceeded our acquisition time of 30-60 s. The correction of the autocorrelation amplitude for the background intensity is crucial, especially for dim molecules where the average intensity of the transient exceeds the background only slightly.

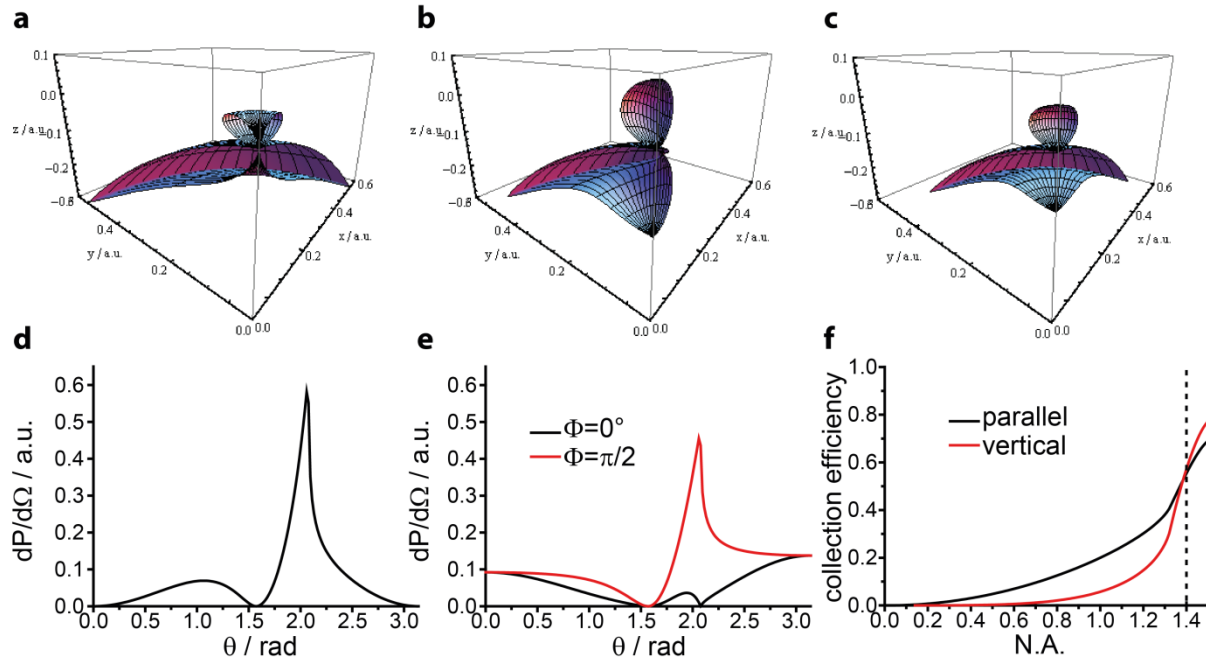

**Supplementary Figure 13 | Determination of collection efficiency of a fluorophore at the glass/water interface with and without ZMW.**

**(a)** Calculated emission pattern for a dipole emitter oriented vertical (z-direction) at an interface ( $z=0$ ) between glass (below,  $n_g=1.52$ ) and buffer (above,  $n_w=1.33$ ). All calculations follow reference <sup>2</sup>. **(b)** Emission pattern for a dipole oriented in x-direction (parallel to interface). **(c)** Emission pattern of rotating dye (average of emitters oriented in x-, y- and z-direction). **(d)** Angular power density  $dP/d\Omega$  ( $\theta$ ) for vertically oriented dipole, with standard spherical coordinates ( $\theta=0$  is the z-axis). **(e)** Angular power density  $dP/d\Omega$  ( $\theta, \Phi$ ) for horizontally oriented dipole at selected polar angles. The collection efficiency is calculated by comparing the total emitted power  $P_{\text{all}} = \int_0^{2\pi} d\Phi \int_0^\pi \sin\theta d\theta \frac{dP}{d\Omega}$  with the collected power  $P_{\text{coll}} = \int_0^{2\pi} d\Phi \int_{\theta_m}^\pi \sin\theta d\theta \frac{dP}{d\Omega}$ , where  $\theta_m$  is defined by the numerical aperture (in our case  $NA=1.40$ ). **(f)** Collection efficiency for a horizontal and vertical oriented emitter depending on the NA. For our setup, the collection efficiency of a randomly oriented dipole is  $\eta = 54\%$ . For the ZMW measurements, we make the assumption, that primarily the emission into the upper half space is suppressed, while the emission into the glass remains identical. We therefore only have to relate to the power emitted into the lower half space  $P_{\text{low}} = \int_0^{2\pi} d\Phi \int_{\pi/2}^\pi \sin\theta d\theta \frac{dP}{d\Omega}$ . This gives a collection efficiency of  $\eta' = 75\%$  and therefore the relative collection efficiency  $\alpha = 0.73$ .

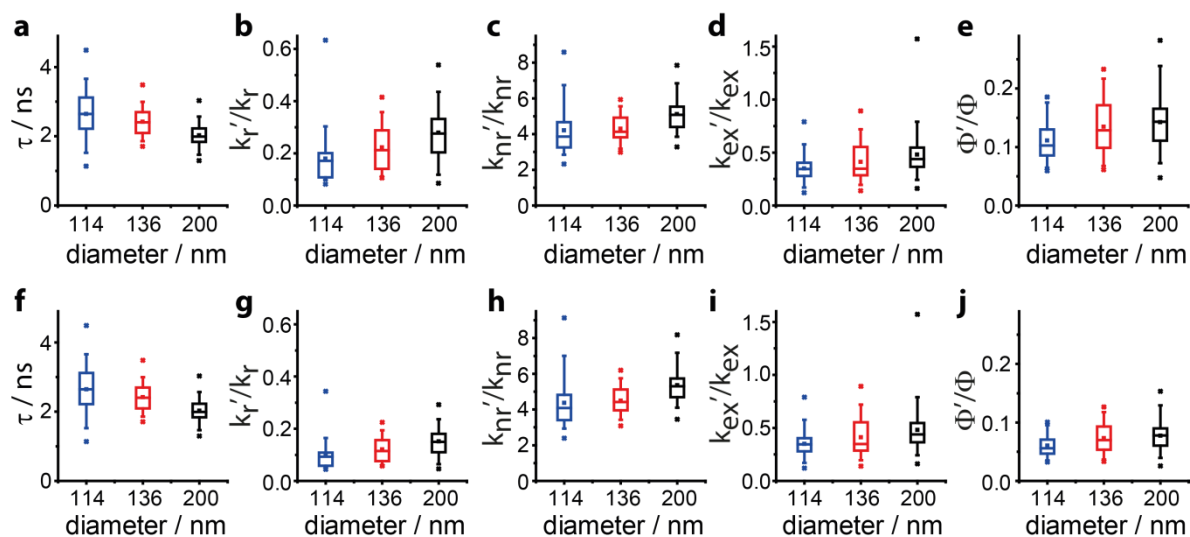

**Supplementary Figure 14 | Photophysical rate changes in ZMWs for extreme cases of collection efficiency.** (a-e) Results for the case that the collection efficiency with and without ZMW is identical (no change in the emission pattern,  $\alpha = 1$ ). (f-j) Results for the extreme case that all emitted fluorescence is collected by the objective ( $\alpha = 0.54$ ). This primarily affects the calculated radiative rate (b, g) and quantum yield (e, j) and has a minor influence on the nonradiative rate (c, h). The trends between ZMW of different diameter remain, however, unchanged as compared to results presented in Figure 7 of the main text (with  $\alpha = 0.73$ ). Sample size:  $n=45$ , 45 and 90 for ZMWs of 114, 136 and 200 nm diameter.

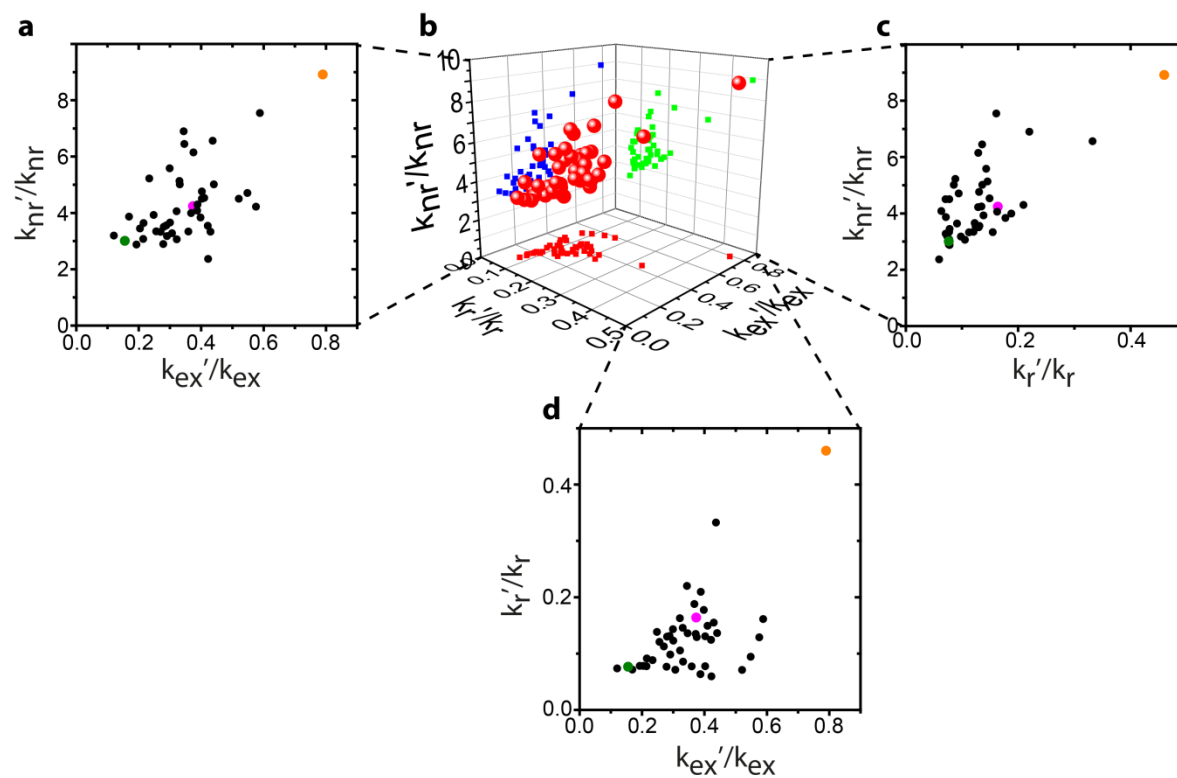

**Supplementary Figure 15 | Correlation plots of the photophysical rates for dyes on 114 nm ZMWs. (b)** 3D scatter plot reveals correlation between all three relevant rates ( $n=45$ ). The projections show correlation plots between two respective rates. **(a)** Correlation between the non-radiative and excitation rate. **(c)** Correlation between the non-radiative and radiative rate. **(d)** Correlation between the radiative and excitation rate. The exemplary molecules from Figure 6 (main text) are marked in orange, magenta and olive.

| start   | end     | sequence 5'--> 3'                         | #  | modification |
|---------|---------|-------------------------------------------|----|--------------|
| 10[239] | 8[240]  | GCCAGTTAGAGGGTAATTGAGCGCTTTAAGAA          | 32 |              |
| 20[79]  | 18[80]  | TTCCAGTCGTAATCATGGTCATAAAAGGGG            | 30 |              |
| 12[47]  | 10[48]  | TAAATCGGGATTCCCAATTCTGCGATATAATG          | 32 |              |
| 19[224] | 21[223] | CTACCATAGTTTGAGTAACATTTAAAATAT            | 30 |              |
| 7[248]  | 9[255]  | GTTTATTTTGTCAACAATCTTACCGAAGCCCTTTAATATCA | 40 |              |
| 21[224] | 23[223] | CTTTAGGGCCTGCAACAGTGCCAATACGTG            | 30 |              |
| 17[128] | 19[127] | AGGCAAAGGGAAGGGCGATCGGCAATTCCA            | 30 |              |
| 14[143] | 13[159] | CAACCGTTTCAAATCACCATCAATTCGAGCCA          | 32 |              |
| 1[128]  | 3[127]  | TGACAACTCGCTGAGGCTTGCAATTATACCA           | 30 |              |
| 19[56]  | 21[63]  | TACCGAGCTCGAATTCGGGAAACCTGTCGTGCAGCTGATT  | 40 |              |
| 7[160]  | 8[144]  | TTATTACGAAGAAGTGGCATGATTGCGAGAGG          | 32 |              |
| 19[192] | 21[191] | ATTATACTAAGAAACCACCAGAAGTCAACAGT          | 32 |              |
| 23[32]  | 22[48]  | CAAATCAAGTTTTTTGGGGTGCAAACGTGGA           | 31 |              |
| 4[79]   | 2[80]   | GCGCAGACAAGAGGCAAAGAATCCCTCAG             | 30 |              |
| 12[143] | 11[159] | TTCTACTACGCGAGCTGAAAAGTTACCGCGC           | 32 |              |
| 4[207]  | 2[208]  | CCACCCTCTATTCACAAACAAATACCTGCCTA          | 32 |              |
| 19[96]  | 21[95]  | CTGTGTGATTGCGTTGCGCTCACTAGAGTTGC          | 32 |              |
| 21[64]  | 23[63]  | GCCCTTCAGAGTCCACTATTAAGGGTGCCGT           | 32 |              |
| 2[111]  | 0[112]  | AAGGCCGCTGATACCGATAGTTGCGACGTTAG          | 32 |              |
| 21[32]  | 23[31]  | TTTTACTCAAAGGGCGAAAAACCATCACC             | 30 |              |
| 6[271]  | 4[272]  | ACCGATTGTCGGCATTTCGGTCATAATCA             | 30 |              |
| 15[96]  | 17[95]  | ATATTTTGGCTTTCATCAACATTATCCAGCCA          | 32 |              |
| 1[256]  | 3[263]  | CAGGAGTGGGGTCAAGTGCCTTGAGTCTCTGAATTTACCG  | 40 |              |
| 10[271] | 8[272]  | ACGCTAACACCCACAAGAATTGAAAATAGC            | 30 |              |
| 18[175] | 16[176] | CTGAGCAAAAATTAATTACATTTTGGGTTA            | 30 |              |
| 6[47]   | 4[48]   | TACGTTAAAGTAATCTTGACAAGAACCGAAT           | 32 |              |
| 15[224] | 17[223] | CCTAAATCAAATCATAGGTCTAAACAGTA             | 30 |              |
| 13[32]  | 15[31]  | AACGCAAAATCGATGAACGGTACCGGTTGA            | 30 |              |
| 22[143] | 21[159] | TCGGCAAATCCTGTTTGATGGTGGACCCTCAA          | 32 |              |
| 9[256]  | 11[255] | GAGAGATAGAGCGTCTTTCCAGAGTTTTGAA           | 32 |              |
| 8[143]  | 7[159]  | CTTTTGCAGATAAAAACCAAATAAAGACTCC           | 32 |              |
| 13[96]  | 15[95]  | TAGGTAAACTATTTTTGAGAGATCAAACGTTA          | 32 |              |
| 15[160] | 16[144] | ATCGCAAGTATGTAAATGCTGATGATAGGAAC          | 32 |              |
| 12[79]  | 10[80]  | AAATTAAGTTGACCATTAGATACTTTTGGC            | 30 |              |
| 7[56]   | 9[63]   | ATGCAGATACATAACGGGAATCGTCATAAATAAAGCAAAG  | 40 |              |
| 19[248] | 21[255] | CGTAAACAGAAATAAAAATCCTTTGCCGAAAGATTAGA    | 40 |              |
| 14[47]  | 12[48]  | AACAAGAGGGATAAAAATTTTAGCATAAAGC           | 32 |              |
| 9[160]  | 10[144] | AGAGAGAAAAAATGAAAATAGCAAGCAAAT            | 32 |              |
| 23[224] | 22[240] | GCACAGACAATTTTTGAATGGGGTCAGTA             | 31 |              |
| 18[111] | 16[112] | TCTTCGCTGCACCGCTTCTGGTGCAGCCTTCC          | 32 |              |
| 18[47]  | 16[48]  | CCAGGGTTGCCAGTTTGAGGGGACCCGTGGGA          | 32 |              |



|         |         |                                           |    |  |
|---------|---------|-------------------------------------------|----|--|
| 20[207] | 18[208] | GCGGAACATCTGAATAATGGAAGGTACAAAAT          | 32 |  |
| 21[256] | 23[255] | GCCGTCAAAAAACAGAGGTGAGGCCTATTAGT          | 32 |  |
| 6[207]  | 4[208]  | TCACCGACGCACCGTAATCAGTAGCAGAACCG          | 32 |  |
| 11[64]  | 13[63]  | GATTTAGTCAATAAAGCCTCAGAGAACCCTCA          | 32 |  |
| 0[111]  | 1[95]   | TAAATGAATTTTCTGTATGGGATTAATTTCTT          | 32 |  |
| 11[224] | 13[223] | GCGAACCTCCAAGAACGGGTATGACAATAA            | 30 |  |
| 23[128] | 23[159] | AACGTGGCGAGAAAGGAAGGAAACCAGTAA            | 31 |  |
| 22[111] | 20[112] | GCCCGAGAGTCCACGCTGGTTTGCAGCTAACT          | 32 |  |
| 1[32]   | 3[31]   | AGGCTCCAGAGGCTTTGAGGACACGGGTAA            | 30 |  |
| 20[175] | 18[176] | ATTATCATTCAATATAATCCTGACAATTAC            | 30 |  |
| 15[192] | 17[191] | TCAAATATAACCTCCGGCTTAGGTAACAATTT          | 32 |  |
| 19[32]  | 21[31]  | GTCGACTTCGGCCAACGCGCGGGGTTTTTC            | 30 |  |
| 23[64]  | 22[80]  | AAAGCACTAAATCGGAACCCTAATCCAGTT            | 30 |  |
| 8[207]  | 6[208]  | AAGGAAACATAAAGGTGGCAACATTATCACCG          | 32 |  |
| 7[224]  | 9[223]  | AACGCAAAGATAGCCGAACAAACCCTGAAC            | 30 |  |
| 22[239] | 20[240] | TTAACACCAGCACTAACAATAATCGTTATTA           | 32 |  |
| 12[111] | 10[112] | TAAATCATATAACCTGTTTAGCTAACCTTTAA          | 32 |  |
| 16[79]  | 14[80]  | GCGAGTAAAAATATTTAAATTGTTACAAAG            | 30 |  |
| 5[224]  | 7[223]  | TCAAGTTTCATTAAGGTGAATATAAAAAGA            | 30 |  |
| 16[175] | 14[176] | TATAACTAACAAAGAACGCGAGAACGCCAA            | 30 |  |
| 23[256] | 22[272] | CTTTAATGCGCGAACTGATAGCCCCACCAG            | 30 |  |
| 0[207]  | 1[191]  | TCACCAGTACAACTACAACGCCTAGTACCAG           | 32 |  |
| 8[175]  | 6[176]  | ATACCCAACAGTATGTTAGCAAATTAGAGC            | 30 |  |
| 22[271] | 20[272] | CAGAAGATTAGATAATACATTTGTCGACAA            | 30 |  |
| 23[192] | 22[208] | ACCCTTCTGACCTGAAAGCGTAAGACGCTGAG          | 32 |  |
| 4[239]  | 2[240]  | GCCTCCCTCAGAATGGAAAGCGCAGTAACAGT          | 32 |  |
| 5[128]  | 7[127]  | AACACCAAATTTCAACTTTAATCGTTTACC            | 30 |  |
| 19[128] | 21[127] | CACAACAGGTGCCTAATGAGTGCCAGCAG             | 30 |  |
| 7[96]   | 9[95]   | TAAGAGCAAATGTTTAGACTGGATAGGAAGCC          | 32 |  |
| 13[184] | 15[191] | GACAAAAGGTAAAGTAATCGCCATATTTAACAAAACCTTTT | 40 |  |
| 0[143]  | 1[127]  | TCTAAAGTTTTGTCGTCTTTCCAGCCGACAA           | 31 |  |
| 21[128] | 23[127] | GCGAAAAATCCCTTATAAATCAAGCCGGCG            | 30 |  |
| 18[143] | 17[159] | CAACTGTTGCGCCATTGCGCATTCAAACATCA          | 32 |  |
| 1[160]  | 2[144]  | TTAGGATTGGCTGAGACTCCTCAATAACCGAT          | 32 |  |
| 18[207] | 16[208] | CGCGCAGATTACCTTTTTTAATGGGAGAGACT          | 32 |  |
| 2[175]  | 0[176]  | TATTAAGAAGCGGGGTTTTGCTCGTAGCAT            | 30 |  |
| 20[239] | 18[240] | ATTTTAAAATCAAATTATTTGCACGGATTTCG          | 32 |  |
| 12[207] | 10[208] | GTACCGCAATTCTAAGAACGCGAGTATTATTT          | 32 |  |
| 11[160] | 12[144] | CCAATAGCTCATCGTAGGAATCATGGCATCAA          | 32 |  |
| 0[47]   | 1[31]   | AGAAAGGAACAATAAAGGAATTCAAAAAAA            | 31 |  |
| 21[192] | 23[191] | TGAAAGGAGCAAATGAAAAATCTAGAGATAGA          | 32 |  |
| 4[271]  | 2[272]  | AAATCACCTTCCAGTAAGCGTCAGTAATAA            | 30 |  |

|         |         |                                          |    |  |
|---------|---------|------------------------------------------|----|--|
| 2[79]   | 0[80]   | CAGCGAAACTTGCTTTTCGAGGTGTTGCTAA          | 30 |  |
| 6[79]   | 4[80]   | TTATACCACCAAATCAACGTAACGAACGAG           | 30 |  |
| 12[239] | 10[240] | CTTATCATTCCCRACTTGCGGGAGCCTAATTT         | 32 |  |
| 12[271] | 10[272] | TGTAGAAATCAAGATTAGTTGCTCTTACCA           | 30 |  |
| 19[160] | 20[144] | GCAATTCACATATTCCTGATTATCAAAGTGTA         | 32 |  |
| 20[271] | 18[272] | CTCGTATTAGAAATTGCGTAGATACAGTAC           | 30 |  |
| 8[79]   | 6[80]   | AATACTGCCCAAAGGAATTACGTGGCTCA            | 30 |  |
| 18[79]  | 16[80]  | GATGTGCTTCAGGAAGATCGCACAATGTGA           | 30 |  |
| 5[32]   | 7[31]   | CATCAAGTAAAACGAACTAACGAGTTGAGA           | 30 |  |
| 23[96]  | 22[112] | CCCATTAGAGCTTGACGGGGAAAAAGAATA           | 32 |  |
| 20[111] | 18[112] | CACATTAATTTGTTATCCGCTCATGCGGGCC          | 32 |  |
| 8[47]   | 6[48]   | ATCCCCCTATACCACATTCACTAGAAAAATC          | 32 |  |
| 3[96]   | 5[95]   | ACACTCATCCATGTTACTTAGCCGAAAGCTGC         | 32 |  |
| 22[47]  | 20[48]  | CTCCAACGCAGTGAGACGGGCAACCAGCTGCA         | 32 |  |
| 14[239] | 12[240] | AGTATAAAGTTCAGCTAATGCAGATGTCTTTC         | 32 |  |
| 9[64]   | 11[63]  | CGGATTGCAGAGCTTAATTGCTGAAACGAGTA         | 32 |  |
| 2[207]  | 0[208]  | TTTCGGAAGTGCCGTGAGAGGGTGAGTTTCG          | 32 |  |
| 8[271]  | 6[272]  | AATAGCTATCAATAGAAAATTC AACATTCA          | 30 |  |
| 16[47]  | 14[48]  | ACAAACGGAAAAGCCCCAAAAACACTGGAGCA         | 32 |  |
| 3[160]  | 4[144]  | TTGACAGGCCACCACCAGAGCCGCGATTTGTA         | 32 |  |
| 6[239]  | 4[240]  | GAAATTATTGCCTTTAGCGTCAGACCGGAACC         | 32 |  |
| 2[47]   | 0[48]   | ACGGCTACAAAAGGAGCCTTTAATGTGAGAAT         | 32 |  |
| 16[207] | 14[208] | ACCTTTTTATTTAGTTAATTTTATAGGGCTT          | 32 |  |
| 20[143] | 19[159] | AAGCCTGGTACGAGCCGGAAGCATAGATGATG         | 32 |  |
| 1[64]   | 3[71]   | TTTATCAGGACAGCATCGGAACGACACCAACCTAAAACGA | 40 |  |
| 17[32]  | 19[31]  | TGCATCTTTCCAGTCACGACGGCCTGCAG            | 30 |  |
| 8[239]  | 6[240]  | AAGTAAGCAGACACCACGGAATAATATTGACG         | 32 |  |
| 1[192]  | 3[191]  | GCGGATAACCTATTATTCTGAAACAGACGATT         | 32 |  |
| 9[32]   | 11[31]  | TTTACCCCAACATGTTTTAAATTTCCATAT           | 30 |  |
| 10[143] | 9[159]  | CCAACAGGAGCGAACCAGACCGGAGCCTTTAC         | 32 |  |
| 10[47]  | 8[48]   | CTGTAGCTTGACTATTATAGTCAGTTCATTGA         | 32 |  |
| 2[239]  | 0[240]  | GCCCGTATCCGGAATAGGTGTATCAGCCCAAT         | 32 |  |
| 1[224]  | 3[223]  | GTATAGCAAACAGTTAATGCCAATCCTCA            | 30 |  |
| 22[207] | 20[208] | AGCCAGCAATTGAGGAAGGTTATCATCTTTT          | 32 |  |
| 6[111]  | 4[112]  | ATTACCTTTGAATAAGGCTTGCCCAAATCCGC         | 32 |  |
| 23[160] | 22[176] | TAAAAGGGACATTCTGGCCAACAAAGCATC           | 30 |  |
| 3[128]  | 5[127]  | AGCGCGATGATAAATTGTGTCGTGACGAGA           | 30 |  |
| 13[160] | 14[144] | GTAATAAGTTAGGCAGAGGCATTTATGATATT         | 32 |  |
| 16[271] | 14[272] | CTTAGATTTAAGGCGTTAAATAAAGCCTGT           | 30 |  |
| 16[111] | 14[112] | TGTAGCCATTAATTCGCATTAATGCCGGA            | 32 |  |
| 22[175] | 20[176] | ACCTTGCTTGGTCAGTTGGCAAAGAGCGGA           | 30 |  |
| 14[175] | 12[176] | CATGTAATAGAATATAAAGTACCAAGCCGT           | 30 |  |

|         |         |                                          |    |  |
|---------|---------|------------------------------------------|----|--|
| 21[160] | 22[144] | TCAATATCGAACCTCAAATATCAATTCCGAAA         | 32 |  |
| 5[96]   | 7[95]   | TCATTCAGATGCGATTTTAAGAACAGGCATAG         | 32 |  |
| 0[79]   | 1[63]   | ACAACTTTCAACAGTTTCAGCGGATGTATCGG         | 32 |  |
| 18[271] | 16[272] | CTTTTACAAAATCGTCGCTATTAGCGATAG           | 30 |  |
| 3[32]   | 5[31]   | AATACGTTTGAAAGAGGACAGACTGACCTT           | 30 |  |
| 17[160] | 18[144] | AGAAAACAAAGAAGATGATGAAACAGGCTGCG         | 32 |  |
| 3[192]  | 5[191]  | GGCCTTGAAGAGCCACCACCCTCAGAAACCAT         | 32 |  |
| 13[120] | 15[127] | AAAGGCCGGAGACAGCTAGCTGATAAATTAATTTTTGT   | 38 |  |
| 22[79]  | 20[80]  | TGGAACAACCGCCTGGCCCTGAGGCCCGCT           | 30 |  |
| 5[160]  | 6[144]  | GCAAGGCCTCACCAGTAGCACCATGGGCTTGA         | 32 |  |
| 14[79]  | 12[80]  | GCTATCAGAAATGCAATGCCTGAATTAGCA           | 30 |  |
| 10[111] | 8[112]  | TTGCTCCTTTCAAATATCGCGTTTGAGGGGGT         | 32 |  |
| 20[47]  | 18[48]  | TTAATGAACTAGAGGATCCCCGGGGGGTAACG         | 32 |  |
| 4[175]  | 2[176]  | CACCAGAAAGGTTGAGGCAGGTCATGAAAG           | 30 |  |
| 0[239]  | 1[223]  | AGGAACCCATGTACCGTAACACTTGATATAA          | 31 |  |
| 11[32]  | 13[31]  | AACAGTTTTGTACCAAAAACATTTTATTTTC          | 30 |  |
| 1[96]   | 3[95]   | AAACAGCTTTTTGCGGGATCGTCAACACTAAA         | 32 |  |
| 13[224] | 15[223] | ACAACATGCCAACGCTCAACAGTCTTCTGA           | 30 |  |
| 6[175]  | 4[176]  | CAGCAAAAAGGAAACGTCACCAATGAGCCGC          | 30 |  |
| 7[192]  | 9[199]  | ATACATACCGAGGAAACGCAATAAGAAGCGCATTAGACGG | 40 |  |
| 0[271]  | 1[255]  | CCACCCTCATTTTCAGGGATAGCAACCGTACT         | 32 |  |
| 4[143]  | 3[159]  | TCATCGCCAACAAAGTACAACGGACGCCAGCA         | 32 |  |
| 21[96]  | 23[95]  | AGCAAGCGTAGGGTTGAGTGTTGTAGGGAGCC         | 32 |  |
| 7[32]   | 9[31]   | TTTAGGACAAATGCTTTAAACAATCAGGTC           | 30 |  |
| 11[256] | 13[255] | GCCTTAAACCAATCAATAATCGGCACGCGCCT         | 32 |  |
| 17[224] | 19[223] | CATAAATCTTTGAATACCAAGTGTTAGAAC           | 30 |  |
| 15[32]  | 17[31]  | TAATCAGCGGATTGACCGTAATCGTAACCG           | 30 |  |
| 18[239] | 16[240] | CCTGATTGCAATATATGTGAGTGATCAATAGT         | 32 |  |
| 10[207] | 8[208]  | ATCCCAATGAGAATTAACGAAACAGTTACCAG         | 32 |  |
| 6[143]  | 5[159]  | GATGGTTTGAACGAGTAGTAAATTTACCATTA         | 32 |  |
| 9[224]  | 11[223] | AAAGTCACAAAATAAACAGCCAGCGTTTTTA          | 30 |  |
| 0[175]  | 0[144]  | TCCACAGACAGCCCTCATAGTTAGCGTAACGA         | 32 |  |
| 2[143]  | 1[159]  | ATATTCGGAACCATCGCCCACGCAGAGAAGGA         | 32 |  |
| 9[96]   | 11[95]  | CGAAAGACTTTGATAAGAGGTCATATTTTCGCA        | 32 |  |
| 13[256] | 15[263] | GTTTATCAATATGCGTTATACAAACCGACCGTGTGATAAA | 40 |  |
| 14[271] | 12[272] | TTAGTATCACAATAGATAAGTCCACGAGCA           | 30 |  |
| 7[128]  | 9[135]  | AGACGACAAAGAAGTTTTGCCATAATTCGAGCTTCAA    | 37 |  |
| 4[47]   | 2[48]   | GACCAACTAATGCCACTACGAAGGGGGTAGCA         | 32 |  |
| 12[175] | 10[176] | TTTTATTTAAGCAAATCAGATATTTTTTGT           | 30 |  |
| 16[239] | 14[240] | GAATTTATTTAATGGTTTAAAATATTCTTACC         | 32 |  |
| 4[111]  | 2[112]  | GACCTGCTCTTTGACCCCCAGCGAGGGAGTTA         | 32 |  |
| 10[175] | 8[176]  | TTAACGTCTAACATAAAAAACAGGTAACGGA          | 30 |  |

|                                                                                |          |                                                   |    |             |
|--------------------------------------------------------------------------------|----------|---------------------------------------------------|----|-------------|
| 17[96]                                                                         | 19[95]   | GCTTTCCGATTACGCCAGCTGGCGGCTGTTTC                  | 32 |             |
| 14[207]                                                                        | 12[208]  | AATTGAGAATTCTGTCCAGACGACTAAACCAA                  | 32 |             |
| 2[271]                                                                         | 0[272]   | GTTTTAACTTAGTACCGCCACCCAGAGCCA                    | 30 |             |
| 3[224]                                                                         | 5[223]   | TTAAAGCCAGAGCCGCCACCTCGACAGAA                     | 30 |             |
| 5[192]                                                                         | 7[191]   | CGATAGCATTGAGCCATTTGGGAACGTAGAAA                  | 32 |             |
| 10[79]                                                                         | 8[80]    | GATGGCTTATCAAAAAGATTAAGAGCGTCC                    | 30 |             |
| 13[64]                                                                         | 15[71]   | TATATTTTGTCAATTCCTGAGAGTGGGAAGATTGTATAAGC         | 40 |             |
| 8[111]                                                                         | 6[112]   | AATAGTAAACACTATCATAACCCTCATTGTGA                  | 32 |             |
| 14[111]                                                                        | 12[112]  | GAGGGTAGGATTCAAAAGGGTGAGACATCCAA                  | 32 |             |
| 11[96]                                                                         | 13[95]   | AATGGTCAACAGGCAAGGCAAAGAGTAATGTG                  | 32 |             |
| 17[192]                                                                        | 19[191]  | CATTTGAAGGCGAATTATTCATTTTTGTTGG                   | 32 |             |
| magenta                                                                        |          |                                                   |    |             |
| 16[143]                                                                        |          | AAAAAAAAAAAAAAAAAGCCATCAAGCTCATTTTTTAACCACAAATCCA | 47 |             |
| 15[128]                                                                        |          | AAAAAAAAAAAAAAAAATAAATCAAATAATTCGCGTCTCGGAAACC    | 45 |             |
| 14[143]                                                                        |          | AAAAAAAAAAAAAAAAACAACCGTTTCAAATCACCATCAATTCGAGCCA | 47 |             |
| green                                                                          |          |                                                   |    |             |
| 4[63]                                                                          | 6[56]    | ATAAGGGAACCGGATATTCATTACGTCAGGACGTTGGGAA          | 40 | 5' biotin   |
| 4[255]                                                                         | 6[248]   | AGCCACCACTGTAGCGCGTTTTCAAGGGAGGGAAGGTAAA          | 40 | 5' biotin   |
| 10[191]                                                                        | 12[184]  | GAAACGATAGAAGGCTTATCCGGTCTCATCGAGAACAAGC          | 40 | 5' biotin   |
| 16[63]                                                                         | 18[56]   | CGGATTCTGACGACAGTATCGGCCGCAAGGCGATTAAGTT          | 40 | 5' biotin   |
| 10[127]                                                                        | 12[120]  | TAGAGAGTTATTTTCATTTGGGGATAGTAGTAGCATTAA           | 38 | 5' biotin   |
| 16[255]                                                                        | 18[248]  | GAGAAGAGATAACCTTGCTTCTGTTCTGGGAGAAACAATAA         | 40 | 5' biotin   |
| red                                                                            |          |                                                   |    |             |
| staples used for individual DNA origamis with dye at five different positions: |          |                                                   |    |             |
| replaces                                                                       | distance |                                                   |    |             |
| 7[160]                                                                         | d1       | TTATTACGAAGAACTGGCATGATTGCG                       | 27 | 3' ATTO647N |
| 9[160]                                                                         | d2       | AGAGAGAAAAAATGAAAATAGCAAGC                        | 27 | 3' ATTO647N |
| 11[160]                                                                        | d3       | CCAATAGCTCATCGTAGGAATCATGGC                       | 27 | 3' ATTO647N |
| 13[160]                                                                        | d4       | GTAATAAGTTAGGCAGAGGCATTTATG                       | 27 | 3' ATTO647N |
| 23[32]                                                                         | d5       | TCAAGTTTTTTGGGGTCGAAACGTGGA                       | 27 | 5' ATTO647N |

**Supplementary Table 1 | Structure details for rectangular DNA origami.** The design is based on the original rectangular structure (7249 nt scaffold derived from M13mp18), but base deletions were included every 48nt along the length of the structure to correct for twist<sup>4,5</sup>.

| Start   | End     | Sequence                                              | Length | Modification |
|---------|---------|-------------------------------------------------------|--------|--------------|
| 57[98]  | 59[97]  | TAGTAAAACGAGAAATAAGAGAGAGTACCTTTAATCGA<br>AGAC        | 42     |              |
| 50[118] | 43[108] | CTGAAAAGGTGGCACAATAAATATTTTCATATT                     | 32     |              |
| 19[18]  | 18[18]  | GCATAAAGTGCCACACAACA                                  | 20     |              |
| 43[109] | 35[111] | TTAGATCTACAGCAAACCTTCGCATCAATAGG                      | 31     |              |
| 18[111] | 7[111]  | AATCAAATTATCTCACCTGGACGTTAGTATTCGCATAAC<br>GCT        | 42     |              |
| 41[109] | 28[108] | GAGTTATACCCAACGGCAAAGACATGCTTTCCTTT                   | 35     |              |
| 34[65]  | 22[66]  | CTGCGTGGCGTCAGGGCATTAAAGCGCTGGTTGCCCTT<br>TGTC        | 42     |              |
| 20[149] | 13[156] | ATATTTGCTCCCCGTATGGGGTCAAATCCTCTGGCCTTG<br>AT         | 41     |              |
| 10[97]  | 13[90]  | AGAGTGAAATCGAAGCGAAAATACATACAACCGAT                   | 35     |              |
| 53[77]  | 50[84]  | GAAACAAACCTACCAATATCAAACCCTAAGCCAGC                   | 35     |              |
| 38[34]  | 45[34]  | TCAGTGACGTTGTAAGACAAAAGATTAA                          | 28     |              |
| 22[34]  | 29[34]  | GCGGGGATTTTCTTCTTTCATCTAAGA                           | 28     |              |
| 29[35]  | 30[35]  | ACGCGAGGTAGGAATTGTTCTCACCCA                           | 28     |              |
| 60[132] | 52[129] | GCAAAGCGACTATCCCTCAACAATACTGAGA                       | 32     |              |
| 6[97]   | 9[90]   | TATTATCGGTTTTGCAGAGGGAAGGTAATTACCAT                   | 35     |              |
| 33[56]  | 34[56]  | CAATAATTAACAACGGCGAAGCAAGTG                           | 28     |              |
| 1[84]   | 9[76]   | TCCATACTCAATGAGTTAGAGTCTGAGCTCCGGTGTGA<br>AACCACCAGT  | 49     |              |
| 53[67]  | 41[66]  | TACAAATCGCTTGAATTTGCTTCTATCAAAAACTATAG<br>TGA         | 42     |              |
| 19[112] | 23[125] | TTGGTAAGGAGGTTGAACCGCCACCCTCCATAGTTGAA<br>GACG        | 42     |              |
| 9[77]   | 6[83]   | AGCACCAATATTGAAGTCTAATGAAGTCTTGCAGAC                  | 36     |              |
| 32[128] | 25[129] | CGTAAACAGCAAAAAGCTGTATGCAGCCCTAGAG                    | 35     |              |
| 46[62]  | 53[55]  | CCCTTCTGACCTGATAGCCCTCGAATTATACAGTA                   | 35     |              |
| 50[128] | 42[126] | GGGCAAAGAATACTTTTGTAAATGTAGAGGGT                      | 31     |              |
| 59[60]  | 51[66]  | AGTATTAGACATAATACTATCTTTTTGGCAACTTG                   | 35     |              |
| 53[140] | 56[133] | AGCAACAAAAACCAAGATACAGTAGCTCAACATGTATT<br>GCTGTGAATCC | 49     |              |
| 18[97]  | 21[90]  | GAGCAGCGACGCAGTCAACATAAAAAACAATAGCTA                  | 35     |              |
| 30[139] | 37[139] | CTGGCGATTCCGGCTTTTTCGAGACTTT                          | 28     |              |
| 8[107]  | 3[122]  | CCAATCACCGCGTTTTCGCTAGCGCGTTTTTCATCGG                 | 35     |              |
| 23[126] | 14[126] | CCTGGTCACTGCGTGATTGTGGTGTGAGTATTGCTTAT<br>CAA         | 42     |              |
| 34[55]  | 41[55]  | TAGCGGTCTCGTTATGCGTTAGAAATAC                          | 28     |              |
| 1[60]   | 0[60]   | GTTGTGCAGAAAAAAGATTG                                  | 20     |              |
| 61[119] | 59[132] | TTACCCTGGATTGCCGAGCTTCAAAGCG                          | 28     |              |
| 9[91]   | 10[98]  | TAGCAATAATCAAACCAGAACTAAAAGATCAAAGG                   | 35     |              |
| 34[97]  | 37[90]  | TTTGAGGGCTCATTAAACGGAATCATAATAAAGTAC                  | 35     |              |

|         |         |                                                       |    |
|---------|---------|-------------------------------------------------------|----|
| 25[35]  | 26[35]  | AATAAGACGAGCGTTTTCACTGTTTG                            | 28 |
| 17[119] | 18[112] | CAGGAGTTATTTTCGAGTAAGCGCTTAAAACAGCAA                  | 35 |
| 50[139] | 57[141] | TATTTTCGACCATTAATAGCGCGGAATCG                         | 30 |
| 51[67]  | 46[63]  | CTGAGGTGAGCGCCATTGATAGAA                              | 24 |
| 34[139] | 41[139] | ACGTTGGCGTCTGGTAAAACAATTGTGT                          | 28 |
| 53[34]  | 52[31]  | AACGTCAGGAAATTGCGTA                                   | 19 |
| 10[118] | 17[118] | CGCTGGCAACTATCCTGAATTGATGATA                          | 28 |
| 29[161] | 30[161] | TCAGCGGGCGAATATTAACCAGGTGCGG                          | 28 |
| 31[109] | 19[111] | AGGGATTAAGGTTGTAACCAGGCTTCCGATAGGCAATG<br>CCATGAA     | 45 |
| 34[76]  | 41[76]  | GCGCTAGGCTAAACAAAAGCCATAAGGC                          | 28 |
| 21[77]  | 18[84]  | AATAGCAGGGAAGCCGCTCACTGCCCTTGTCTCGA                   | 35 |
| 34[183] | 41[177] | TCTCCGTGGGAGCGAGACGAAGGAAC                            | 26 |
| 44[166] | 53[156] | CTTGCCGGCCGAAAATCGGTTGTACCGCCTCAGACGG<br>AACAAC       | 44 |
| 25[140] | 26[140] | CATTTTCTAGCATTGTTGTCGCGCAACA                          | 28 |
| 54[83]  | 61[76]  | CAATATCTGGTCAGAGGAGCATATCATCCATTATC                   | 35 |
| 28[107] | 21[108] | AATAGACGTTTCGATCTAACCTCATAGTACCGAGG                   | 35 |
| 7[49]   | 14[56]  | GCATACAGAATTATGTTTTACCAGCGCCAGAAACGTTG<br>CCCTCACTCGC | 49 |
| 0[97]   | 3[90]   | ATGAGTATGTTTCTTCAGGCCGAAACGGTTTGCC                    | 35 |
| 26[160] | 33[160] | TAGAAGAATGCGTAATAATTTACAATGA                          | 28 |
| 32[23]  | 20[22]  | TCAATCCCATCGCGCCCCCGGTATGAGCCTATTTATCCA<br>TTGAG      | 44 |
| 3[63]   | 1[83]   | AATCAGTAGCGACAGAATCAATCACCATCTTGTC                    | 35 |
| 49[119] | 50[119] | TAAGAACAGTTGAGGGCAAGGGCGCGAG                          | 28 |
| 53[119] | 54[119] | GGAATTATTTTGAAGTAGATATGCAAC                           | 28 |
| 21[46]  | 8[42]   | TAACAGAAGGCAAAAAGAACCCAGGTTTCATATCACCGTC              | 38 |
| 37[13]  | 38[15]  | AATCGCCAGCTCAACATGGTTGGAGTAA                          | 28 |
| 30[160] | 37[160] | GCCTCTTCGGAAACTTGCAGGTCCATTA                          | 28 |
| 54[118] | 61[118] | TAAAGTATTGCGGAAAACAGTCAGGTCT                          | 28 |
| 58[82]  | 60[65]  | GAGCCGTCAATAGTTTACAACGAACGTTATTA                      | 32 |
| 48[107] | 41[108] | CCAACCTTATATTTCAAAGAGTAACGCATAGAACG                   | 35 |
| 51[35]  | 42[45]  | GCAGCAAATGAAAACACCGCCGAACTGAAAGCGTAATT<br>ATTTCAAGC   | 46 |
| 29[140] | 30[140] | GCTAAACTTGAAAATCGCATTACGCCAG                          | 28 |
| 33[140] | 34[140] | CGATAGTAGGCCGCACCGCTTATAGGTC                          | 28 |
| 3[91]   | 6[98]   | TTTAGCGTCAGACTCATCTTTTTACATAGGTTGAG                   | 35 |
| 25[56]  | 26[56]  | TAACGTCCCTGAATAGCTGATTTGCCCC                          | 28 |
| 28[44]  | 21[45]  | ATCGCGTTTTACGCTAAAACGATTCTGAACGAGT                    | 35 |
| 53[91]  | 54[98]  | TTCGCAATGCAGATAGAGGGGTGATTCTGGAAGT                    | 35 |
| 41[35]  | 42[35]  | AAATTTAAATCGCAGCAATACTGCAACA                          | 28 |
| 26[55]  | 33[55]  | AGCAGGCAACAAGATTTTTATAACCAAT                          | 28 |
| 52[128] | 45[129] | GGCCGAGGCAATTCATCTGGCTCAAATTGGGGGAT                   | 35 |

|         |         |                                                 |    |  |
|---------|---------|-------------------------------------------------|----|--|
| 37[56]  | 38[56]  | CATTTTCTATCATAGAATCAGGCCAGAA                    | 28 |  |
| 31[130] | 26[119] | GCTAAGGGGGCCAAGCTAAAAATGCGCCGCC                 | 31 |  |
| 21[140] | 22[140] | GCGGGGTGCCCGGATGCTGGAATTA                       | 28 |  |
| 13[91]  | 14[98]  | TGAGGCCACCAGAGCCAGTAACAAGACCAGATTT              | 35 |  |
| 17[31]  | 18[35]  | AACGGAATACCAAACCGAGGAGATGATCCGCT                | 32 |  |
| 31[46]  | 22[45]  | CGGTGAACCAAGTTTGGGAAAATCGTGAGACGAAT             | 35 |  |
| 29[119] | 30[119] | GAATTTTGCTCCAAGCCAGTGATGTGCT                    | 28 |  |
| 34[34]  | 41[34]  | CCACCACGAGCACGAGTATAACTGACCT                    | 28 |  |
| 25[161] | 26[161] | CAATAGGCAGTACAGCCAGGATCAGAAA                    | 28 |  |
| 6[118]  | 0[98]   | GTACTIONAACATCGAACATTGCAAGGAGTTTATAA            | 35 |  |
| 21[56]  | 22[56]  | AATAAGAAATTAATAACTACCAGCTG                      | 28 |  |
| 30[118] | 37[118] | GCAAGGCAAGATCGAGCAGCGTACAGAG                    | 28 |  |
| 42[125] | 49[118] | AGCTATTTTTGAGAAATGCAATGGTTTAGCGATTT             | 35 |  |
| 30[23]  | 22[18]  | TTGGATAGGGTCCGAAGGGTGGTGAGGCGGTTT               | 34 |  |
| 45[91]  | 46[98]  | TTTTTCCTTCATCACTTTAATCCTCATAACGCAAG             | 35 |  |
| 30[149] | 19[150] | ATTCACCCTCATTACAGGACTTGTGAGCGAATGAA             | 35 |  |
| 22[139] | 29[139] | CTCAGGCGTTCAGGCCACAGAGGATTTT                    | 28 |  |
| 46[34]  | 44[23]  | GTGGCACAGTCTTCTGAGCAAAAGAAGAAACATCTCC<br>TT     | 40 |  |
| 6[143]  | 13[139] | GAGTCTGTAGTGTCGTCTGCCACCGCAGGTC                 | 32 |  |
| 22[118] | 29[118] | CAGAGCAGATGAACAGCGTAAAGTAAAT                    | 28 |  |
| 29[12]  | 30[9]   | AAGGCTTATAATAGCAAGCCCGAGGGTGCAGGTGC             | 35 |  |
| 46[118] | 53[118] | AAGCCTTTCATACAATTTAGGGCCAAAA                    | 28 |  |
| 21[109] | 8[108]  | CTGTTATTCTGGCTTTTTACCGTTCGCCGCGCCG              | 35 |  |
| 37[35]  | 38[35]  | AACATGTTCTTACCTATAACGTTTATAA                    | 28 |  |
| 17[67]  | 2[63]   | CCTATATAAAAAAGACATATTCATGCAAAATATCGATA          | 38 |  |
| 45[140] | 46[140] | CAAATCACAGAACGAAGATTCTTATGAC                    | 28 |  |
| 49[35]  | 50[32]  | CAAAATTC AATTACAATGCGCTGCAACAGTG                | 31 |  |
| 41[91]  | 42[98]  | AACACACAAAGTACGCTGGCTAGTCTGGAAAGGCT             | 35 |  |
| 11[126] | 6[119]  | TTACGCACATATGAATTTGCGGTCAGATGATGACC             | 35 |  |
| 39[25]  | 30[24]  | AACGGCCACCCTTTGACACCCGCCAGGGAGCTTTT             | 35 |  |
| 50[151] | 39[150] | CCTGTCAATAAAAAAACAAAAAGGGTAGCTGATGTC            | 37 |  |
| 33[14]  | 34[10]  | AAATAATACAATAGACCCTAAGCGCTTAATGC                | 32 |  |
| 18[34]  | 25[34]  | CACAATTTAAAGCCGAGGGTACAATCCA                    | 28 |  |
| 17[77]  | 14[84]  | CAGTATGTTAAGAACC GGGTACCGAGGAAGAACC             | 35 |  |
| 41[161] | 42[161] | TGTTACTAGGGAACACCCCGGATATTCA                    | 28 |  |
| 29[67]  | 17[66]  | CGGATTTTATAAAAAATGACGGGAGGCAAGAACAGATA<br>GGACT | 42 |  |
| 26[184] | 33[177] | ACATCATTGAAGGGATTCAACTAACAC                     | 27 |  |
| 37[91]  | 38[98]  | CGACACGAGGGTAGAAGCGCGTTTTAACTAAATTT             | 35 |  |
| 35[112] | 39[125] | AACGCCACCAGCGAATTTGTATCATCGCGTGTACATCGA<br>TGA  | 42 |  |
| 38[160] | 45[166] | GATTGTACATATGTGCGAACTGAAAGCTGCTCATT             | 34 |  |

|         |         |                                                       |    |
|---------|---------|-------------------------------------------------------|----|
| 14[83]  | 21[76]  | AATATTACATAACATGGATCCAAGTAAGACAATGA                   | 35 |
| 14[162] | 21[166] | TTGTTGTTCCCGTGAAAACAGTGAGTACCAGGCGGA                  | 36 |
| 60[97]  | 60[98]  | CCCGATATTAATCGGAACAAAGAAAACCATAAATGAG<br>GAAG         | 42 |
| 14[139] | 21[139] | ACTCCTGTAACTGTAATGCCAGGATTA                           | 28 |
| 59[98]  | 51[111] | TTCAAATATCGCGTGGATTAGGTCATTTTCGGTGTCCAAT<br>TCT       | 42 |
| 41[67]  | 29[66]  | TAATGTTTAGGAGCCAGACGACAACGGCTGTGAACAAG<br>CTTG        | 42 |
| 38[118] | 45[118] | GTAAAAAAGAGAAGACCAGGTCTTGAC                           | 28 |
| 42[83]  | 49[76]  | GGCCTTGCTGGTAAACACGACATAACCTACCTTTT                   | 35 |
| 50[97]  | 53[90]  | TACTAATTAACAGTGTGGAAGGGTTAGATAACGGA                   | 35 |
| 12[128] | 9[144]  | AGCGGTTGAGCTCAGAGACCGGAACCGCCTCCCTCA                  | 36 |
| 29[56]  | 30[56]  | CTCCCGACAAGCCGGTCCACTGATGGCC                          | 28 |
| 49[91]  | 50[98]  | ACATATTGTGAATTCATTCAATAACATCTCAATTC                   | 35 |
| 29[91]  | 30[98]  | AAGATCGTCTTTCCTGTATCGTCACGACTTGGGTA                   | 35 |
| 38[55]  | 43[62]  | TCCTGAGATTAGTAGCTGATGTCAATAGTGAATTTGTAA<br>ATCCAGATTC | 49 |
| 57[77]  | 54[84]  | GATTATAGCGGAATCTAACAATAATCTCATCAAT                    | 35 |
| 38[97]  | 41[90]  | TTGTTAAGCCTGAGGAAACCTCCGGCTTAAGAATA                   | 35 |
| 42[139] | 49[139] | ATGCCGGTAGGTAAGTAGTATTATACC                           | 28 |
| 18[139] | 25[139] | AAACTGCCTGGAACATAGGTGCCACCCT                          | 28 |
| 30[55]  | 37[55]  | CACTACGGGAAAGCCATGTTTCGCAGAGG                         | 28 |
| 10[83]  | 17[76]  | TCCCCATTCTGCAACAAAACATGGCAACTATTACG                   | 35 |
| 49[140] | 50[140] | AGTCAGGTTACAGGAATTAAGTTAGCTA                          | 28 |
| 19[151] | 11[151] | CGGCGCTAACACGAAGTGCCATCCTTGGA                         | 29 |
| 43[168] | 34[171] | GACAGTCCAATATGTTGATAACCCAAAATAAATGTGAA<br>C           | 39 |
| 14[97]  | 17[90]  | CTGCGGCGTATTACGACCGAAGCCCTTTTGTAGCAA                  | 35 |
| 25[91]  | 26[98]  | AGAATAGAACCGCCAAGTTTTGTGGCGAATATCTG                   | 35 |
| 45[130] | 32[129] | ATTATGAACGCTGATAACTCATCTGGACTAAGGAT                   | 35 |
| 30[34]  | 37[34]  | AATCAAGCCCCGATGCGCCTGCAACGCC                          | 28 |
| 2[123]  | 10[119] | CCCCCTTATTAGGAACCAGAGCCACCCACCACATGCTG<br>ATGTCTGA    | 47 |
| 46[97]  | 49[90]  | GATAAAAGTAGCATCTCTGATTGCTTTGAAACAGT                   | 35 |
| 43[63]  | 34[66]  | ACCAGTCTATCCAGCACTTGCACGGTACAGCGGGAGGC<br>G           | 39 |
| 29[77]  | 26[77]  | TGAAGCCACCGCACACTCCAACGTCATTTTAGTTGCAGC<br>AAG        | 42 |
| 58[132] | 50[129] | GAAGCAAGAGCTTATTTAAATTTAGTTTATTT                      | 32 |
| 30[97]  | 33[90]  | ACGCCAGGACGACAAAAAAGGTAAAGTACCAAGAA                   | 35 |
| 37[161] | 38[161] | AACGGGTCTAAAACCAACATACAGGAA                           | 28 |
| 17[56]  | 18[56]  | TGATTAACCGAACAGAGTCACTGTTCC                           | 28 |
| 42[97]  | 45[90]  | ATCAGGTTTAGAACCAAATCAATATATGGACTACC                   | 35 |



|         |         |                                                     |    |
|---------|---------|-----------------------------------------------------|----|
| 42[44]  | 31[45]  | CATTTCTTTGAAGTGTGGCTTTCCACGCTGTTGA                  | 35 |
| 21[119] | 22[119] | TCAAGAGGTACTIONCACACCATCGAAGCGG                     | 28 |
| 32[170] | 25[177] | TCGCATCGCCAGGAATTAGTGAGATCGTCACAACCCAT<br>GTA       | 41 |
| 17[91]  | 18[98]  | ACGTAGTCATACATGAAACATGAAGGTGACTCAAC                 | 35 |
| 6[82]   | 13[76]  | ATCACGAAGGTGTGTTTATACGGAAATAAAGGGC                  | 34 |
| 22[55]  | 29[55]  | CATTAATGGGCAACCTTACCAAGCGAAC                        | 28 |
| 22[97]  | 25[90]  | ACTGGGGTGTGAGTGTTAGTTGCTATTTTACAGAG                 | 35 |
| 38[76]  | 45[76]  | GACAGGACTGAGTAGTTATATTCATAGG                        | 28 |
| 52[48]  | 45[45]  | AAATAAAATGAATATTCATTTAATTACATTAATTAAGAA             | 39 |
| 33[35]  | 34[35]  | TACGAGCGCAGAACTTAGAGCCCGCTAA                        | 28 |
| 61[65]  | 53[66]  | AGTAAATATTCATCCTGAAATTATTCTTT                       | 30 |
| 8[144]  | 17[139] | AGAACTCACAGCCAGGTGAGTATCTGTGCTATCCAGA<br>ATTAATAAG  | 47 |
| 55[123] | 60[112] | TTAACTCCAACAGGTCATTTAATTATCAAAA                     | 31 |
| 13[140] | 14[140] | AGACGATATTTAAAGTACGGGGTGGGAAG                       | 28 |
| 25[77]  | 22[84]  | CAGCCTTTGCACCCTGGCCCTGAGAGGTATGCTTT                 | 35 |
| 46[139] | 53[139] | CCTGTAATTAGCAATAGAAAAGTAGTAAG                       | 28 |
| 42[55]  | 49[55]  | TTACCGCACATTGGGTGCTATTTAACA                         | 28 |
| 15[161] | 25[160] | GACGGAAGAACGAGGATATTGGAAAGAATTGATATGC<br>AAGCC      | 42 |
| 41[13]  | 42[19]  | AGTTAATTAGAAAACACTCACGCAGG                          | 24 |
| 30[76]  | 37[76]  | CCGTCTAAGAAAGGCCAGACGTAATAAG                        | 28 |
| 18[55]  | 25[55]  | TGTGTGAAGTGAGCTGAACACTTTTGT                         | 28 |
| 26[118] | 33[118] | TGAACCAAACGACGAAGGAGCGAGGTGA                        | 28 |
| 33[91]  | 34[98]  | CGGGTTTATCAGCTGCATCGGGTATCGGCTGCCAG                 | 35 |
| 15[28]  | 22[35]  | GTTTTATGGAACGAACCCACAAGAATTAAGTCATGG<br>GGTGCCAACGC | 49 |
| 25[130] | 12[129] | CCATATCACCAAGGATTCCCTGCCGTACTIONGGGAA               | 35 |
| 57[53]  | 58[60]  | CATCAATATATGATTATTCTAAAAATT                         | 27 |
| 41[56]  | 42[56]  | CGACCGTTGTAAATATAACATAACAATA                        | 28 |
| 10[62]  | 17[55]  | GAAATGACTGATACACGATACCAAAGACTGGCA                   | 35 |
| 26[97]  | 29[90]  | CCACTCATTCCCAGGTATTAACCAAGTTTAAATC                  | 35 |
| 46[82]  | 53[76]  | TCTGGCCAACAGAAAAAATAAGTTACAATCGGGA                  | 34 |
| 7[112]  | 11[125] | TGTGAAACCTCAGACAGCATTGACAGGAGCAGTCTGAC<br>ATCA      | 42 |
| 37[140] | 38[140] | TTCATGAAATACACCCTTCCCTATATTTA                       | 28 |
| 22[65]  | 10[63]  | GTGCATTAATTCATAGCAGGAGAAATCCTCGCTCTGTAT<br>GTGCGA   | 45 |
| 61[77]  | 58[83]  | ATTTTGCCTTTGCCACAATTCGACACTIONTGGAGATTA             | 36 |
| 34[160] | 41[160] | TTGACCGCTTTTCAAGAAAGAGTGCTCCA                       | 28 |
| 53[56]  | 54[52]  | ACAGTACTGCACGTGCATCACATCAACAGTTG                    | 32 |
| 0[121]  | 1[120]  | ACATACATTGCTGATACCG                                 | 19 |
| 14[125] | 21[118] | GCACTIONGCACTIONGGGATGGGGAACCTAAGACTCC              | 35 |

|         |         |                                                        |    |  |
|---------|---------|--------------------------------------------------------|----|--|
| 49[77]  | 46[83]  | TTAATGGAATACCACCGAACGAACCATAATGGACAT                   | 36 |  |
| 39[151] | 30[150] | AATTAAGCAAGTAGCCATAATGGGCTGGTGCCGCT                    | 35 |  |
| 21[91]  | 22[98]  | TCTTAAAGTATTAAGCCACCCACCTTTTCATGACG                    | 35 |  |
| 33[151] | 20[150] | CCGTTTCACGAACCTTTCACGCCTGAGGGATAAAGT                   | 35 |  |
| 20[166] | 29[160] | AGAGGGACCAGCAGAGAGGTTTGAAGTGCAAGTTAAC<br>TACAAACAGTT   | 48 |  |
| 9[42]   | 7[62]   | GCCATTTGGGAATTAGAGCCATAAAGGTAATATTC                    | 35 |  |
| 54[97]  | 57[97]  | TTCATTCCCTTTTGTGCCACCAGAAGGACTTCTGAATAA<br>TAA         | 42 |  |
| 7[63]   | 6[49]   | CATGAAGTTATGTAGATGAAGGTATAGA                           | 28 |  |
| 30[184] | 37[178] | TGTTGGGAAGTTCGCCAGATATATGTAA                           | 28 |  |
| 33[161] | 34[161] | CAACAACCTGAGGCCAGGCAACGGCGGA                           | 28 |  |
| 51[112] | 55[122] | GCGAACGAAAGAAGGACTGGATAGCGTCATGCTTTTGG<br>C            | 39 |  |
| 60[111] | 48[108] | AGATTAACAAAAATTCAGAAAATGTTTATTTTGGCACAT<br>AACAAATA    | 46 |  |
| 45[46]  | 28[45]  | GAGCAAATCCATGGTTTTACAAATAATTTAGAGCTAATA<br>TGTAGATTTTC | 49 |  |
| 13[77]  | 10[84]  | GACATTCATAAAGGTATAGATGATTATTGAACAAA                    | 35 |  |
| 42[160] | 49[164] | ACCGTTCTGAGAAACTGACGAGAAGAAAAATC                       | 32 |  |
| 52[155] | 40[150] | ACGACGATACTATCATAACATTAACGTTGGGAAACACA<br>CGTAACACCA   | 48 |  |
| 49[56]  | 52[49]  | ATTTTCATGCAGAGGAAAACATGCGGTCAGTATTAATC<br>TAAAAAACAG   | 49 |  |
| 41[77]  | 38[77]  | GTAAATAGGTTGGGAAGAAGTCAAATTATAAAGGGAT<br>TTTA          | 42 |  |
| 26[76]  | 33[76]  | CGGTCCAAACGTGGTCATCGACTTTCCT                           | 28 |  |
| 42[34]  | 49[34]  | GGAAAAAATCGTCTCTTAGAAAAGAAAA                           | 28 |  |
| 45[77]  | 42[84]  | TCTGAGATGAGTGACAGTAATAAAAGTTCACTATC                    | 35 |  |
| 40[177] | 32[171] | GTCAATCATATAGCCGGCACCAACAAAATACTCGG                    | 35 |  |
| 41[140] | 42[140] | CGAAATCTTGAAAGACTAGCATAAATTA                           | 28 |  |
| 18[83]  | 25[76]  | ATTCGTAATCATGGTGCGTTGGCATTAGAAAATAG                    | 35 |  |
| 25[11]  | 26[9]   | AGCCATATTAATTTGCCGGCGCCAATCGGCAAATC                    | 36 |  |
| 40[149] | 33[150] | ACTCGCGACCGCAAAGGGGAAGTTGAGTTAATGCG                    | 35 |  |
| 26[139] | 33[139] | CAGCAATTTATTATTCTCCAATTGATAC                           | 28 |  |
| 14[55]  | 21[55]  | GGGGATTCACTCCAAGTTACGCCAAT                             | 28 |  |
| 22[44]  | 10[38]  | CGGCCTAATGAATTGTTATAAATGTATTTTAGGTGGAAC<br>GTGCAAATTT  | 49 |  |
| 17[140] | 18[140] | TTTTAACAAACAGTGAAAGCAAGTAGGG                           | 28 |  |
| 50[83]  | 57[76]  | AGAAGATAAAACAGAACCTCAATATCAATTGTTTG                    | 35 |  |
| 34[170] | 23[173] | AAAAGCGCCAGGCGATCACAGTTCTTCAGCAGGATCT                  | 37 |  |
| 45[35]  | 46[35]  | GACGCTGATTTTCCGAAATGGAGAATAC                           | 28 |  |
| 39[126] | 31[129] | ACGGTAAAACGTTATAATTCGTGTAGATGCCA                       | 32 |  |
| 13[31]  | 14[28]  | TCAATAGAAAAAATAAGTCGAGTACTCTGAACCTCGCTA<br>C           | 39 |  |

|         |         |                                                    |    |             |
|---------|---------|----------------------------------------------------|----|-------------|
| 26[34]  | 33[34]  | ATGGTGGTTGAGTGTCATTACCCTAATT                       | 28 |             |
| 45[119] | 46[119] | AAGAACCCTTGAGATGCCTGAGCGGGAG                       | 28 |             |
| 22[83]  | 29[76]  | CCAGTCGGGAAACCCACCGCCAGCTACAGAGGTTT                | 35 |             |
| 45[23]  | 32[24]  | AGCTTGAACGCGTCATCTTAGCCAACCTATTTAATTTA             | 37 |             |
| 38[139] | 45[139] | AATTGTATCGTAAAAGGACAGCATTACC                       | 28 |             |
| 33[77]  | 30[77]  | TATCATTATTCTGTAAGGGAAGAAAGACGGAAGGGCG<br>AAAAA     | 42 | 5'-biotin   |
| 33[119] | 31[108] | ATTTCTTCACCCTCCACTCCAGGGCGCATCGTAACCGTG<br>CATCCTC | 46 | 5'-biotin   |
| 37[119] | 38[119] | GCTTTGATTGACCCTCAAAAAATATTTT                       | 28 | 5'-biotin   |
| 37[77]  | 34[77]  | AGAATATTACTAGAAGGAGGCCGATTCAGGCGAAAGG<br>AGCGG     | 42 | 5'-biotin   |
| 47[22]  | 39[24]  | GCTATTAGACAATACGCTCACGCTCATAATT                    | 31 | 3'-Atto647N |

**Supplementary Table 2 | DNA origami structure details for DNA nanodisk.** The DNA nanodisk is designed from an 8634 nt long M13mp18 derived scaffold and generally consists of four layers in a honeycomb lattice. The table presents the full list of staple strands, modified staple strands are grouped at the end.

|                                                |
|------------------------------------------------|
| <u>Thermocycler Program</u>                    |
|                                                |
| 80°C for 4 minutes                             |
| 80°C for 24 sec -0.1°C per cycle 200 times     |
| 60°C for 12 minutes -0.1°C per cycle 400 times |
| 5°C for ever                                   |
| End                                            |

**Supplementary Table 3.** Detailed folding program for the DNA origami nanodisk

## Supplementary Note 1 - Autocorrelation analysis with derivation

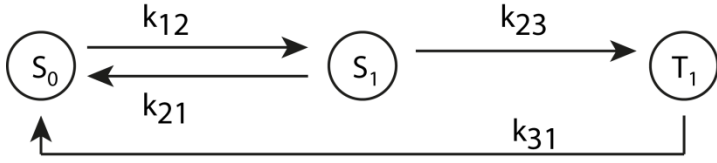

We consider a three level system with rate constants  $k_{mn}$  for transition from state  $m$  to state  $n$ . The three states are the singlet ground state  $S_0(t)$ , the first excited singlet state  $S_1(t)$  and the triplet state  $T_1(t)$ . The system is fully described by the following set of homogeneous first order differential equations:

$$\frac{d}{dt} \vec{X}(t) = \frac{d}{dt} \begin{pmatrix} S_0(t) \\ S_1(t) \\ T_1(t) \end{pmatrix} = \begin{pmatrix} -k_{12} & k_{21} & k_{31} \\ k_{12} & -k_{21} - k_{23} & 0 \\ 0 & k_{23} & -k_{31} \end{pmatrix} \begin{pmatrix} S_0(t) \\ S_1(t) \\ T_1(t) \end{pmatrix}$$

Considering that radiative and non-radiative processes occur on a significantly faster timescale than the intersystem crossing, one can assume  $k_{21} \gg (k_{23} + k_{31})$ . With this, the solution to this set of equations with the molecule initially in its ground state  $\vec{X}(0) = (1, 0, 0)$  can be simplified to:

$$S_0(t) = \frac{k_{21} k_{31}}{k_{21} k_{31} + k_{12}(k_{23} + k_{31})} + \frac{k_{12}}{(k_{12} + k_{21})} \text{Exp}[-(k_{12} + k_{21})t] \\ + \frac{k_{12} k_{23} k_{21}}{(k_{12} + k_{21})(k_{21} k_{31} + k_{12}(k_{23} + k_{31}))} \text{Exp}\left[-\left(\frac{k_{12} k_{23}}{k_{12} + k_{21}} + k_{31}\right)t\right]$$

$$S_1(t) = \frac{k_{12} k_{31}}{k_{21} k_{31} + k_{12}(k_{23} + k_{31})} - \frac{k_{12}}{(k_{12} + k_{21})} \text{Exp}[-(k_{12} + k_{21})t] \\ + \frac{(k_{12})^2 k_{23}}{(k_{12} + k_{21})(k_{21} k_{31} + k_{12}(k_{23} + k_{31}))} \text{Exp}\left[-\left(\frac{k_{12} k_{23}}{k_{12} + k_{21}} + k_{31}\right)t\right]$$

$$T_1(t) = \frac{k_{12} k_{23}}{k_{21} k_{31} + k_{12}(k_{23} + k_{31})} - \frac{k_{12} k_{23}}{(k_{21} k_{31} + k_{12}(k_{23} + k_{31}))} \text{Exp}\left[-\left(\frac{k_{12} k_{23}}{k_{12} + k_{21}} + k_{31}\right)t\right]$$

and describes the probability that an individual molecule resides in the  $S_0$ ,  $S_1$  or the  $T_1$  state at a certain time  $t$  after it is reset to its ground state at  $t=0$ <sup>6</sup>. The constant term is the steady state probability, while the terms with decay constants  $\tau_2 = (k_{12} + k_{21})^{-1}$  and  $\tau_3 = (k_{12} k_{23} / (k_{12} + k_{21}) + k_{31})^{-1}$  represent the antibunching and triplet dynamics, respectively.

Following ref.<sup>7</sup>, the normalized autocorrelation function (AC) for three states can be defined as

$$G'(\tau) = \frac{\langle I(t)I(t + \tau) \rangle}{\langle I(t) \rangle^2} = \frac{\sum_{m=1}^3 \sum_{n=1}^3 I_m I_n P(m) P(m, t | n, t + \tau)}{(\sum_{m=1}^3 I_m P(m))^2}$$

where  $P(m)$  is the probability of detecting a molecule in state  $m$  and  $P(m,t|n,t+\tau)$  the probability of subsequently detecting it in state  $m$  at time  $t$  and in state  $n$  at time  $t+\tau$ . The formula greatly simplifies, since in our case only state 2 (the excited singlet state  $S_1$ ), is fluorescent ( $I_m I_n = I_2^2 \delta_{m2} \delta_{n2}$ , with Kronecker delta  $\delta$ ).  $P(2)$  is the steady state probability of the  $S_1$  population  $S_1(\infty)$  and because after each detected photon the system is reset to its groundstate,  $P(m,t|n,t+\tau)$  can simply be expressed as  $S_1(\tau)$  presented above. This can be summarized to

$$\begin{aligned} G'(\tau) &= \frac{S_1(\tau)}{S_1(\infty)} = 1 - \frac{k_{12}}{(k_{12} + k_{21})} \frac{k_{21} k_{31} + k_{12}(k_{23} + k_{31})}{k_{12} k_{31}} \text{Exp}[-(k_{12} + k_{21})\tau] \\ &\quad + \frac{(k_{12})^2 k_{23}}{(k_{12} + k_{21}) k_{12} k_{31}} \text{Exp}\left[-\left(\frac{k_{12} k_{23}}{k_{12} + k_{21}} + k_{31}\right)\tau\right] \\ &= 1 - 0 + \frac{k_{12} k_{23}}{(k_{12} + k_{21}) k_{31}} \text{Exp}\left[-\left(\frac{k_{12} k_{23}}{k_{12} + k_{21}} + k_{31}\right)\tau\right] \\ &= 1 + A_3 \text{Exp}\left[-\frac{\tau}{\tau_3}\right] \end{aligned}$$

We ignore the second term, since these antibunching dynamics occur on shorter timescales than observed in our autocorrelation analysis and therefore  $\text{Exp}[-(k_{12} + k_{21})\tau] = 0$ . Because we only measure monoexponential autocorrelation functions, we now omit the index "3" of the amplitude and decay time in the following for simplicity. The parameters of the autocorrelation function generally relate to the macroscopic on- and off-times as follows:

$$\tau = (k_{\text{off}} + k_{\text{on}})^{-1}$$

$$A = \frac{k_{\text{off}}}{k_{\text{on}}}$$

$$t_{\text{off}} = k_{\text{on}}^{-1} = \tau(1 + A)$$

$$t_{\text{on}} = k_{\text{off}}^{-1} = \tau\left(1 + \frac{1}{A}\right)$$

The experimental observables relate to the rate constants from Figure 1 of the main text as

$$k_{\text{off}} = \frac{k_{12} k_{23}}{k_{12} + k_{21}} = \frac{k_{\text{ex}} k_{\text{ISC}}}{k_{\text{ex}} + (k_{\text{r}} + k_{\text{nr}})} = k_{\text{ex}} k_{\text{ISC}} \tau_{\text{fl}} = t_{\text{on}}^{-1}$$

$$k_{\text{on}} = k_{31} = k_{\text{t}}$$

Here  $\tau_{fl}$  is the fluorescence lifetime of the excited state and we employ the low excitation regime approximation ( $k_{ex} \ll \tau_{fl}^{-1}$ ). The expression for the off-rate equals equation (1) of the main text.

Experimentally, the correlations  $G(\tau)$  are calculated from the fluorescence transients  $I(t)$  as

$$G(\tau) = G'(\tau) - 1 = \frac{\langle I(t)I(t+\tau) \rangle}{\langle I(t) \rangle^2} - 1 = \frac{\langle \delta I(t)\delta I(t+\tau) \rangle}{\langle I(t) \rangle^2}$$

where  $\langle \rangle$  denotes temporal averaging and  $\delta I(t) = I(t) - \langle I(t) \rangle$ . Compared to the conventional AC definition, we subtract the constant offset of value 1. The AC is fitted with the monoexponential decay model presented above. We multiply the background correction factor  $C$  to the amplitude of the decay to account for the influence of uncorrelated background signal<sup>8</sup>. The time-averaged background signal  $B$  is determined for each molecule after the fluorophore bleached (NP measurements) or from a poissonian fit to an intensity histogram (ZMW measurements, see Supplementary Figure 10).

$$C = \frac{\langle I(t) \rangle^2}{(\langle I(t) \rangle - B)^2}$$

Together with the mean intensity  $I_m = \langle I(t) \rangle$  we extract the number of detected photons before blinking occurs  $N_{on}$ . The intensity  $I_{on}$  during  $t_{on}$  represents the intensity in the fluorescence transient if no blinking was present.

$$I_m = B + I_{on} \cdot \frac{t_{on}}{t_{on} + t_{off}}$$

$$N_{on} = I_{on}t_{on} = (I_m - B) \cdot (t_{on} + t_{off})$$

$$I_{on} = (I_m - B) \cdot \frac{(t_{on} + t_{off})}{t_{on}}$$

While this derivation describes triplet blinking as employed for the ZMW measurements, it is also valid for monoexponential radical blinking used for the NP measurements. When the triplet state is 100% reduced to a radical state (i.e. only single component in AC function), the definitions of the on-time and on-counts do not change. Only the off-time is changed since radical states have a generally longer off-time compared to triplet states, but the off-states are irrelevant for the analysis presented here.

## Supplementary References

- 1 Schmied, J. J. *et al.* DNA Origami Nanopillars as Standards for Three-dimensional Superresolution Microscopy. *Nano Lett.* **13**, 781-785 (2013).
- 2 Enderlein, J., Ruckstuhl, T. & Seeger, S. Highly Efficient Optical Detection of Surface-Generated Fluorescence. *Appl. Opt.* **38**, 724-732 (1999).
- 3 Acuna, G. P. *et al.* Fluorescence enhancement at docking sites of DNA-directed self-assembled nanoantennas. *Science* **338**, 506-510 (2012).
- 4 Rothmund, P. W. Folding DNA to create nanoscale shapes and patterns. *Nature* **440**, 297-302 (2006).
- 5 Woo, S. & Rothmund, P. W. K. Programmable molecular recognition based on the geometry of DNA nanostructures. *Nat. Chem.* **3**, 620-627 (2011).
- 6 Widengren, J., Mets, U. & Rigler, R. Fluorescence correlation spectroscopy of triplet states in solution: a theoretical and experimental study. *J. Phys. Chem.* **99**, 13368-13379 (1995).
- 7 Kim, H. D. *et al.* Mg<sup>2+</sup>-dependent conformational change of RNA studied by fluorescence correlation and FRET on immobilized single molecules. *Proc. Natl. Acad. Sci. U.S.A.* **99**, 4284-4289 (2002).
- 8 Bernard, J., Fleury, L., Talon, H. & Orrit, M. Photon bunching in the fluorescence from single molecules: A probe for intersystem crossing. *J. Chem. Phys.* **98**, 850-859 (1993).
